# Supplementary material for: Complexity-Building ESIPT-Assisted Synthesis of Fused Polyheterocyclic Sulfonamides
Source: MDPI journal article supplement (doi:10.3390/molecules28186549), 2023-09-10

*Supporting Information for*

**Complexity-Building ESIPT-Assisted Synthesis of Fused Polyheterocyclic Sulfonamides.**

**Srinivas Beduru and Andrei G. Kutateladze\***

Department of Chemistry and Biochemistry, University of Denver, USA, 80208

\*Correspondence: Andrei.Kutateladze@du.edu

| <b>NMR spectra</b>                                                                                                                                                                         | <b>Page</b> |
|--------------------------------------------------------------------------------------------------------------------------------------------------------------------------------------------|-------------|
| <i>N</i> -(2-Formylphenyl)-2-(furan-2-yl)benzenesulfonamide ( <b>8a</b> )                                                                                                                  |             |
| <sup>1</sup> H NMR spectrum                                                                                                                                                                | S5          |
| <sup>13</sup> C NMR spectrum                                                                                                                                                               | S6          |
| <i>N</i> -(2-Formylphenyl)-2-(thiophen-2-yl)benzenesulfonamide ( <b>8b</b> )                                                                                                               |             |
| <sup>1</sup> H NMR spectrum                                                                                                                                                                | S7          |
| <sup>13</sup> C NMR spectrum                                                                                                                                                               | S8          |
| <i>N</i> -(2-Formylphenyl)-2-(furan-2-yl)-4,5-dimethoxybenzenesulfonamide ( <b>8c</b> )                                                                                                    |             |
| <sup>1</sup> H NMR spectrum                                                                                                                                                                | S9          |
| <sup>13</sup> C NMR spectrum                                                                                                                                                               | S10         |
| <i>N</i> -(2-Formylphenyl)-4,5-dimethoxy-2-(thiophen-2-yl)benzenesulfonamide ( <b>8d</b> )                                                                                                 |             |
| <sup>1</sup> H NMR spectrum                                                                                                                                                                | S11         |
| <sup>13</sup> C NMR spectrum                                                                                                                                                               | S12         |
| 2-(Furan-2-yl)- <i>N</i> -(8-oxo-5,6,7,8-tetrahydronaphthalen-1-yl)benzenesulfonamide ( <b>10c</b> )                                                                                       |             |
| <sup>1</sup> H NMR spectrum                                                                                                                                                                | S13         |
| <sup>13</sup> C NMR spectrum                                                                                                                                                               | S14         |
| (5 <i>S</i> ,6 <i>S</i> ,8 <i>aS</i> )-5-Hydroxy-5,6-dihydro-6,8 <i>a</i> -epoxybenzo[ <i>g</i> ]benzo[4,5]isothiazolo[2,3- <i>a</i> ]azocine 13,13-dioxide ( <b>11a</b> )                 |             |
| <sup>1</sup> H NMR spectrum                                                                                                                                                                | S15         |
| <sup>13</sup> C NMR spectrum                                                                                                                                                               | S16         |
| HSQC spectrum                                                                                                                                                                              | S17         |
| (4 <i>bR</i> ,7 <i>aS</i> ,8 <i>R</i> )-8-Hydroxy-7 <i>a</i> ,8-dihydrobenzo[4,5]isothiazolo[2,3- <i>a</i> ]thieno[2,3- <i>b</i> ]quinoline 14,14-dioxide ( <b>11b</b> )                   |             |
| <sup>1</sup> H NMR spectrum                                                                                                                                                                | S18         |
| <sup>13</sup> C NMR spectrum                                                                                                                                                               | S19         |
| HSQC spectrum                                                                                                                                                                              | S20         |
| (5 <i>R</i> ,6 <i>R</i> ,8 <i>aR</i> )-5-Hydroxy-10,11-dimethoxy-5,6-dihydro-6,8 <i>a</i> -epoxybenzo[ <i>g</i> ]benzo[4,5]isothiazolo[2,3- <i>a</i> ]azocine 13,13-dioxide ( <b>11c</b> ) |             |
| <sup>1</sup> H NMR spectrum                                                                                                                                                                | S21         |

|                                                                                                                                                                                                       |     |
|-------------------------------------------------------------------------------------------------------------------------------------------------------------------------------------------------------|-----|
| <sup>13</sup> C NMR spectrum                                                                                                                                                                          | S22 |
| HSQC spectrum                                                                                                                                                                                         | S23 |
| <i>(4bR,7aS,8R)</i> -8-Hydroxy-2,3-dimethoxy-7a,8-dihydrobenzo[4,5]isothiazolo[2,3-a]thieno[2,3-b]quinoline 14,14-dioxide ( <b>11d</b> )                                                              |     |
| <sup>1</sup> H NMR spectrum                                                                                                                                                                           | S24 |
| <sup>13</sup> C NMR spectrum                                                                                                                                                                          | S25 |
| HSQC spectrum                                                                                                                                                                                         | S26 |
| <i>(4bR,7aS,8S)</i> -8-Hydroxy-8-methyl-7a,8-dihydrobenzo[4,5]isothiazolo[2,3-a]furo[2,3-b]quinoline 14,14-dioxide ( <b>11e</b> )                                                                     |     |
| <sup>1</sup> H NMR spectrum                                                                                                                                                                           | S27 |
| <sup>13</sup> C NMR spectrum                                                                                                                                                                          | S28 |
| HSQC spectrum                                                                                                                                                                                         | S29 |
| <i>(5R,6S,8aS)</i> -5-Hydroxy-5-methyl-5,6-dihydro-6,8a-epoxybenzo[g]benzo[4,5]isothiazolo[2,3-a]azocine 13,13-dioxide ( <b>11ea</b> )                                                                |     |
| <sup>1</sup> H NMR spectrum                                                                                                                                                                           | S30 |
| <sup>13</sup> C NMR spectrum                                                                                                                                                                          | S31 |
| HSQC spectrum                                                                                                                                                                                         | S32 |
| <i>(4bR,7aS,8R)</i> -8-Hydroxy-8-methyl-7a,8-dihydrobenzo[4,5]isothiazolo[2,3-a]thieno[2,3-b]quinoline 14,14-dioxide ( <b>11f</b> )                                                                   |     |
| <sup>1</sup> H NMR spectrum                                                                                                                                                                           | S33 |
| <sup>13</sup> C NMR spectrum                                                                                                                                                                          | S34 |
| HSQC spectrum                                                                                                                                                                                         | S35 |
| <i>(3aR,15aS,15bS)</i> -15a-Hydroxy-14,15,15a,15b-tetrahydro-13H-benzo[de]benzo[4,5]isothiazolo[2,3-a]furo[2,3-b]quinoline 8,8-dioxide ( <b>11g</b> )                                                 |     |
| <sup>1</sup> H NMR spectrum                                                                                                                                                                           | S36 |
| <sup>13</sup> C NMR spectrum                                                                                                                                                                          | S37 |
| HSQC spectrum                                                                                                                                                                                         | S38 |
| <i>(5aR,17aS,17bS)</i> -17a-Hydroxy-2-methylene-1,2,4a,16,17,17a,17b,17c-octahydro-3H,15H-benzo[de]benzo[4,5]isothiazolo[2,3-a]pyrano[3',2':4,5]furo[2,3-b]quinolin-3-one 10,10-dioxide ( <b>12</b> ) |     |
| <sup>1</sup> H NMR spectrum                                                                                                                                                                           | S39 |
| <sup>13</sup> C NMR spectrum                                                                                                                                                                          | S40 |
| HSQC spectrum                                                                                                                                                                                         | S41 |

*(5aR,17aS,17bS)-17a-Hydroxy-2-methylene-1,2,4a,16,17,17a,17b,17c-octahydro-3H,15H-benzo[de]benzo[4,5]isothiazolo[2,3-a]pyrano[3',2':4,5]furo[2,3-b]quinolin-3-one 10,10-dioxide (13)*

|                               |     |
|-------------------------------|-----|
| <sup>1</sup> H NMR spectrum   | S42 |
| <sup>13</sup> C NMR spectrum  | S43 |
| HSQC spectrum                 | S44 |
| NOESY spectrum                | S45 |
| UV Spectra of photoprecursors | S46 |

$^1\text{H}$  NMR spectrum of **8a** (500 MHz,  $\text{CDCl}_3$ )

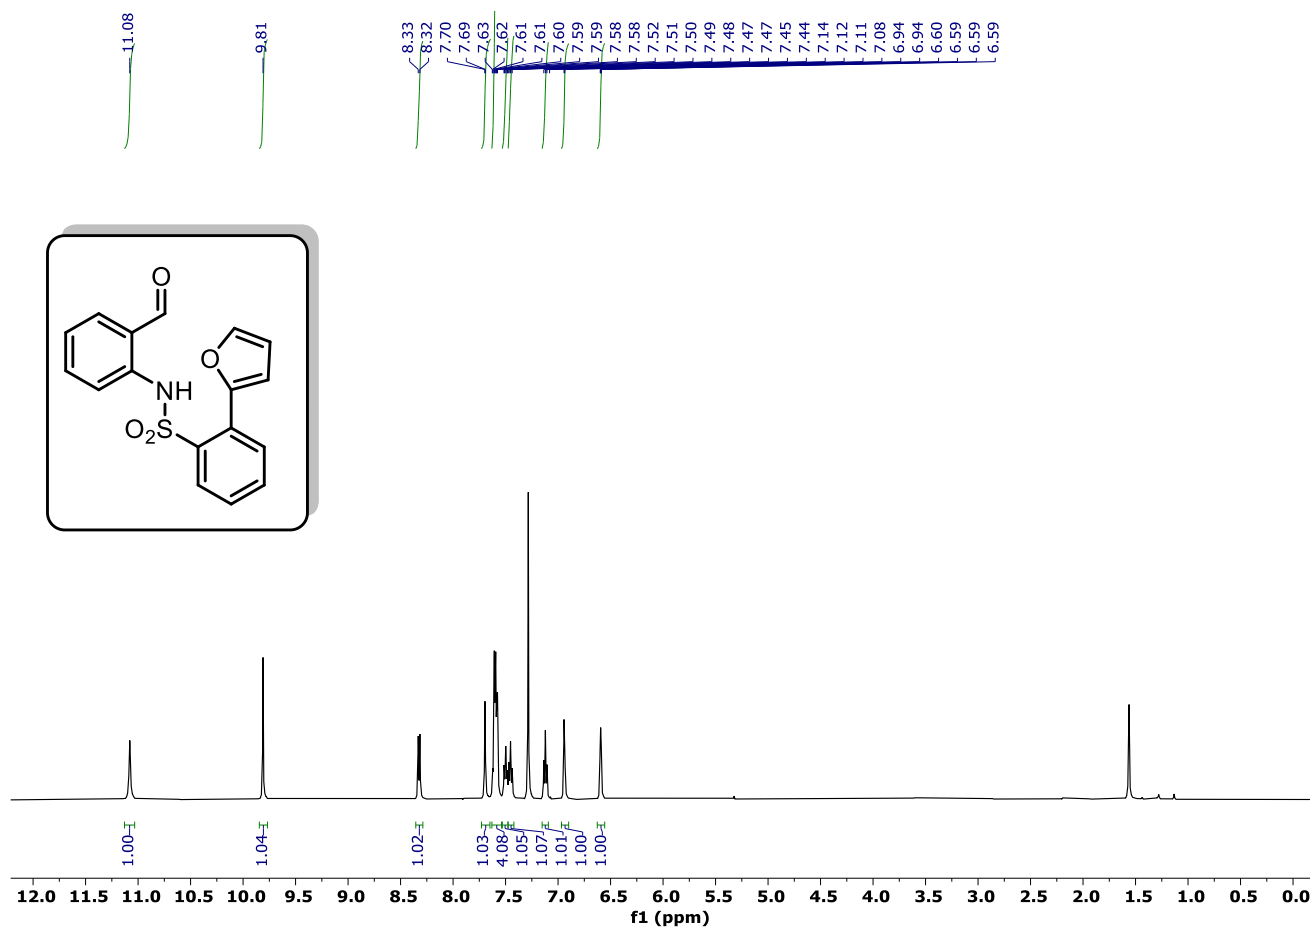

$^{13}\text{C}$  NMR spectrum of **8a** (126 MHz,  $\text{CDCl}_3$ )

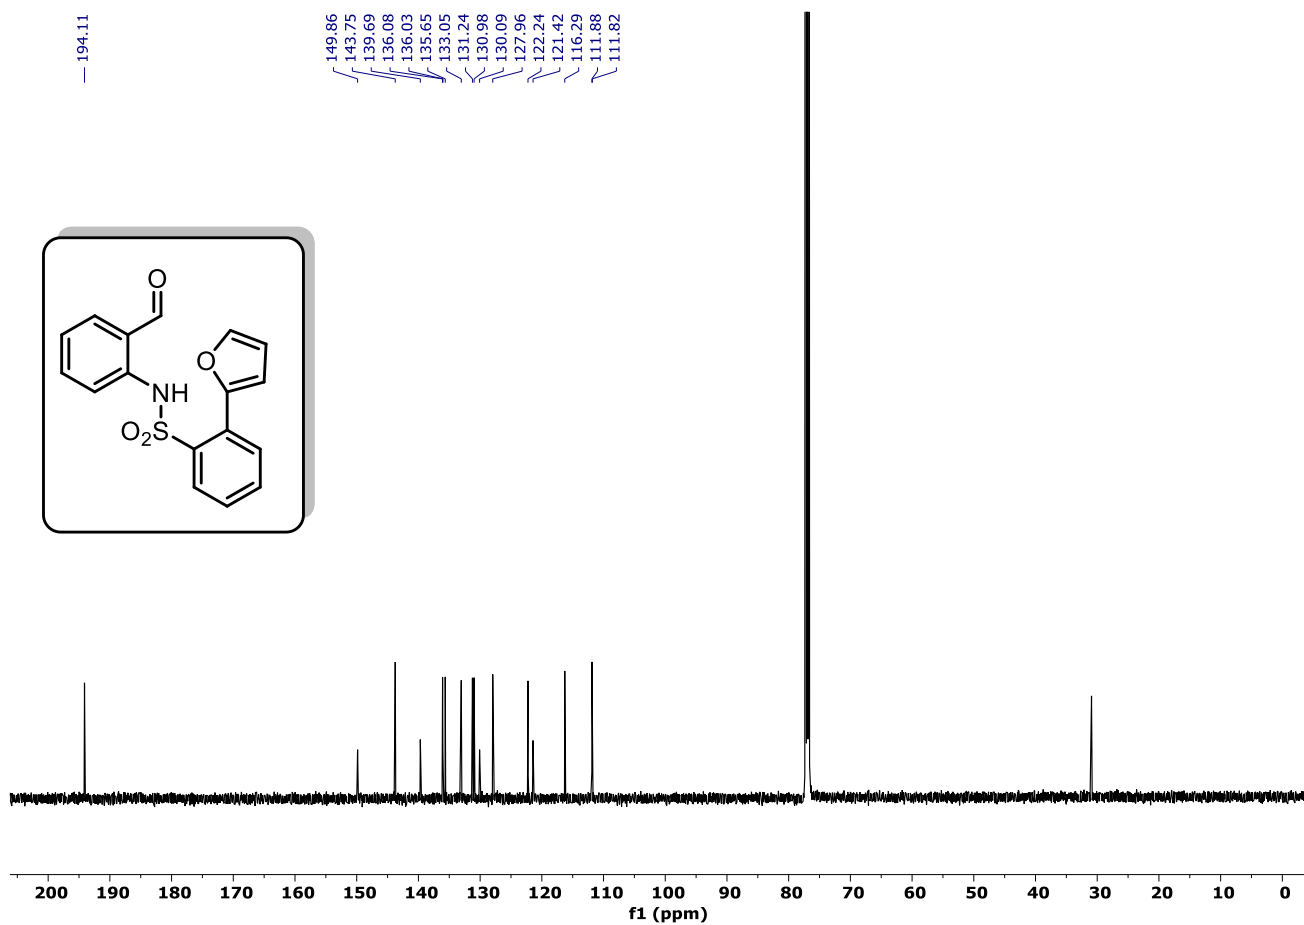

$^1\text{H}$  NMR spectrum of **8b** (500 MHz,  $\text{CDCl}_3$ )

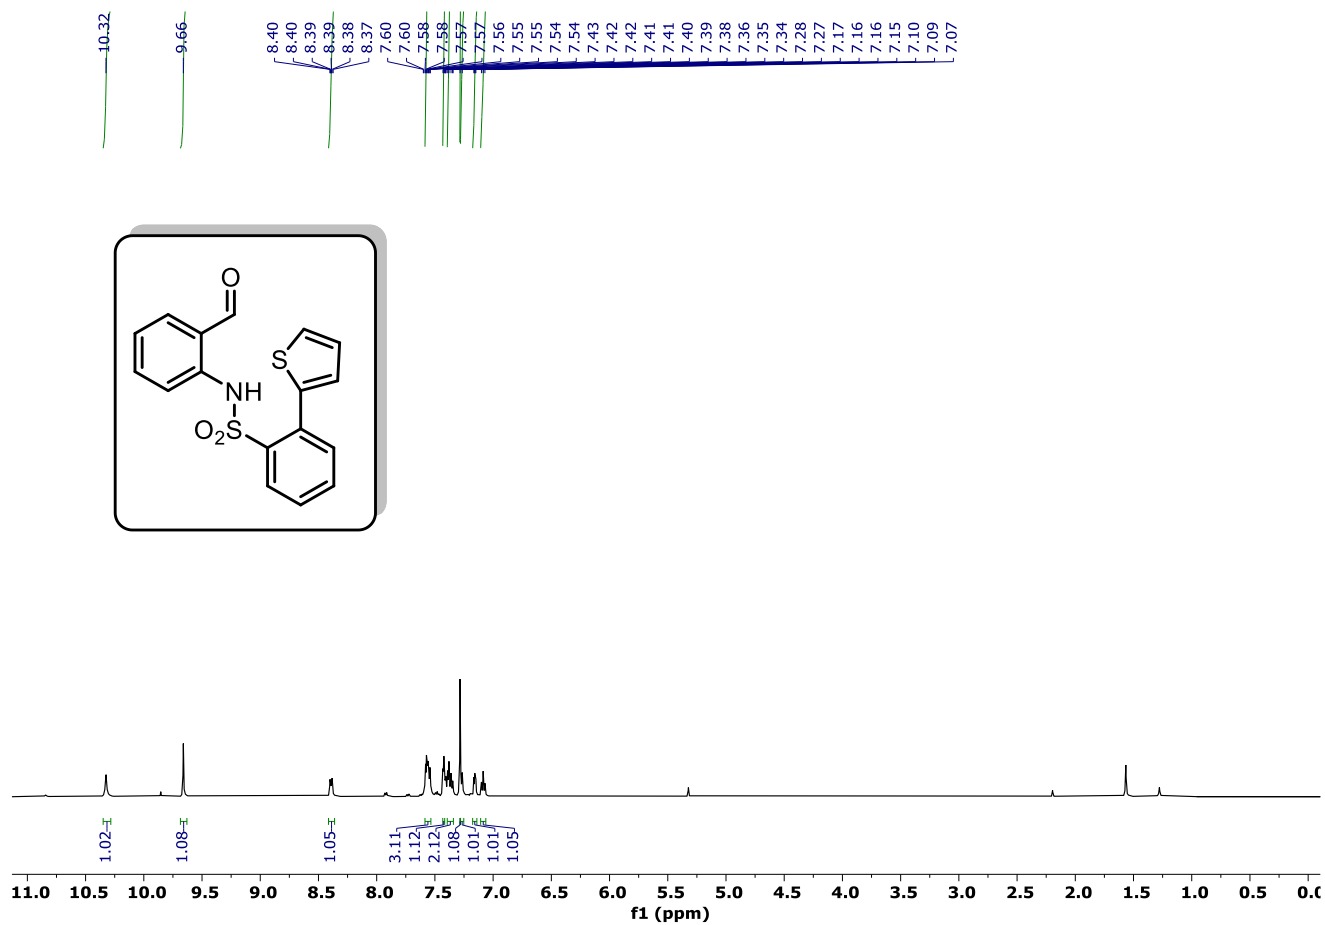

$^{13}\text{C}$  NMR spectrum of **8b** (126 MHz,  $\text{CDCl}_3$ )

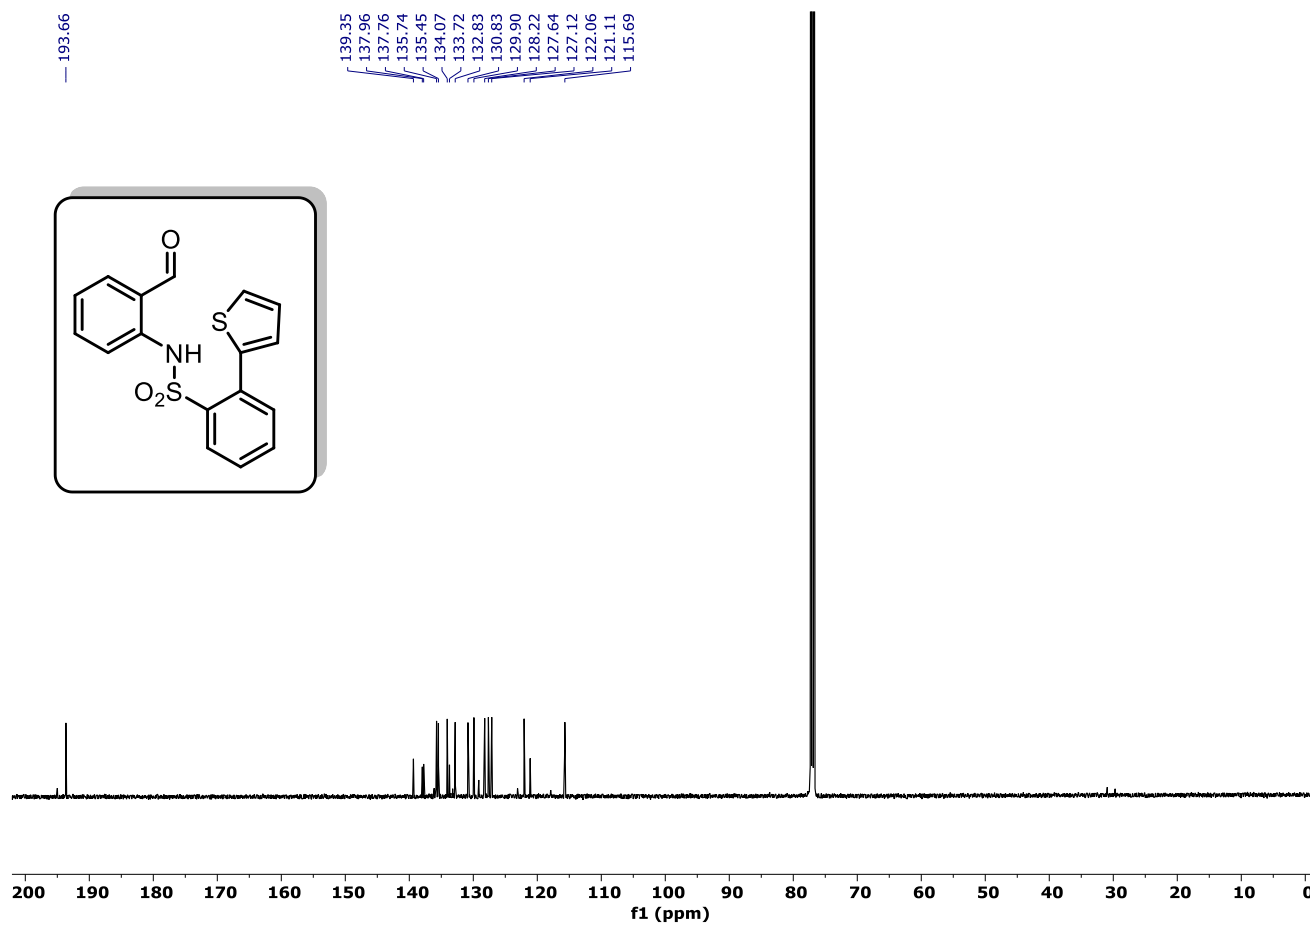

$^1\text{H}$  NMR spectrum of **8c** (500 MHz,  $\text{CDCl}_3$ )

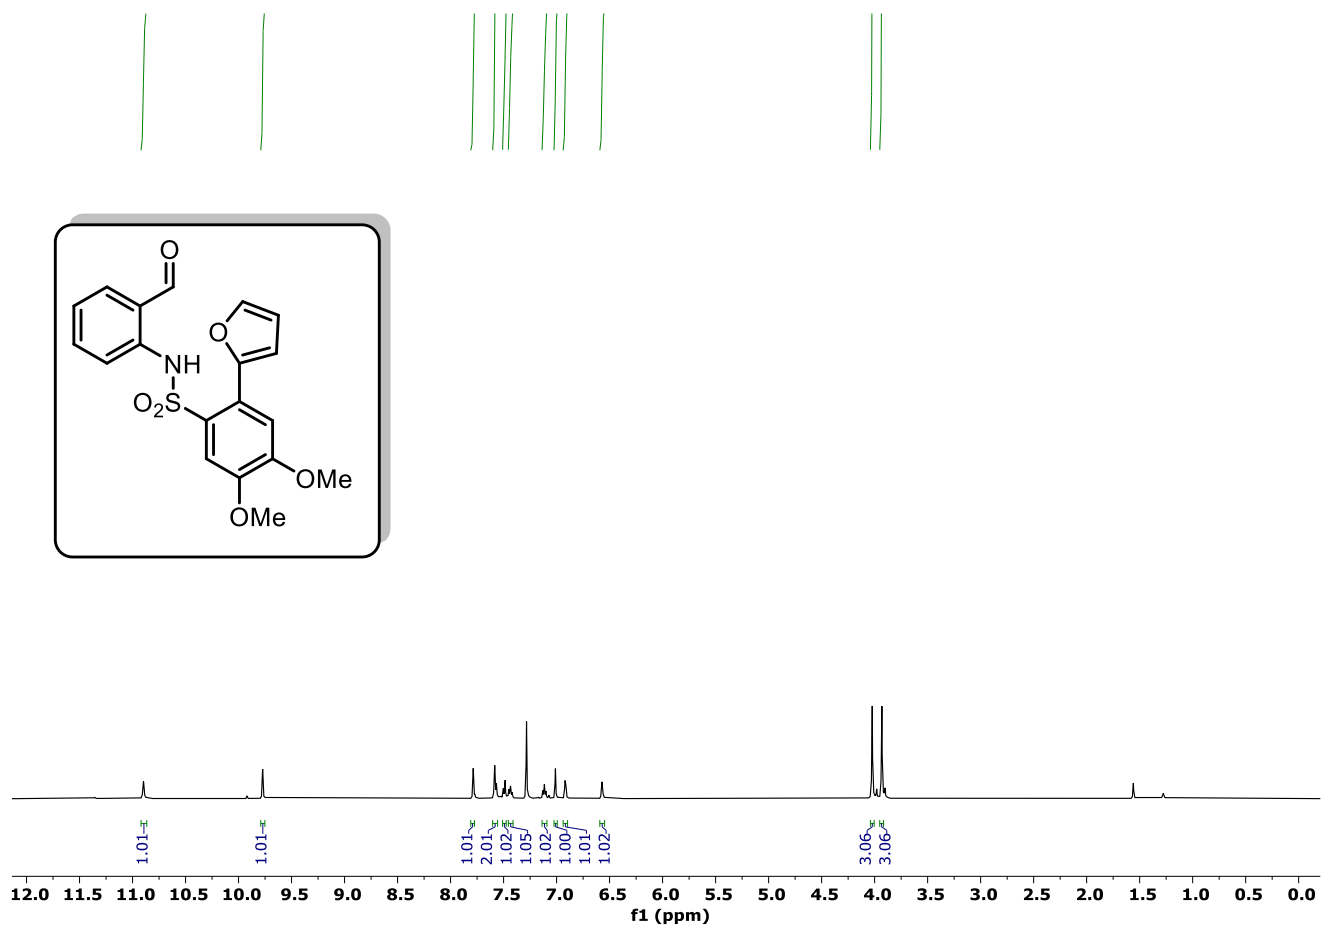

$^{13}\text{C}$  NMR spectrum of **8c** (126 MHz,  $\text{CDCl}_3$ )

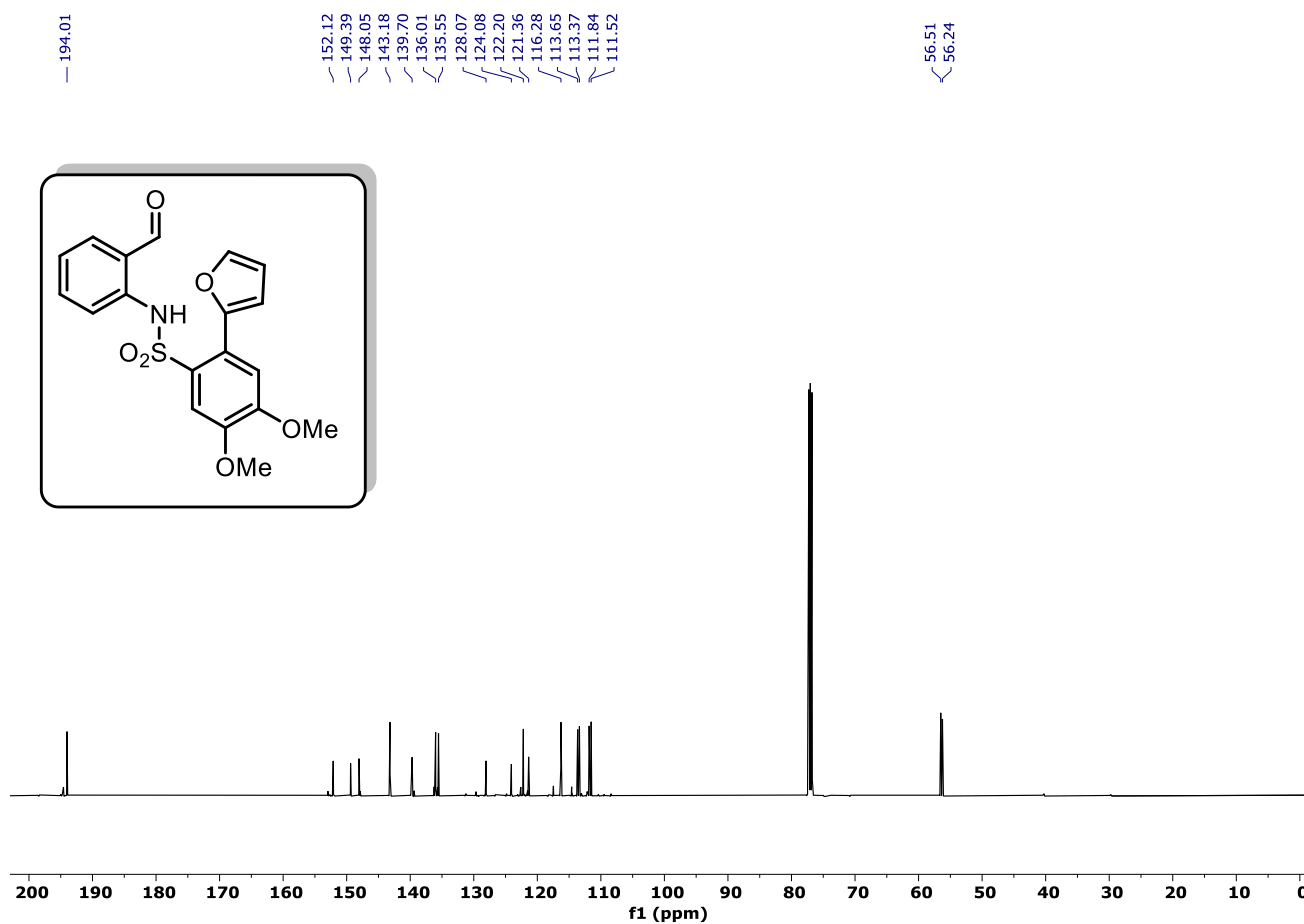

$^1\text{H}$  NMR spectrum of **8d** (500 MHz,  $\text{CDCl}_3$ )

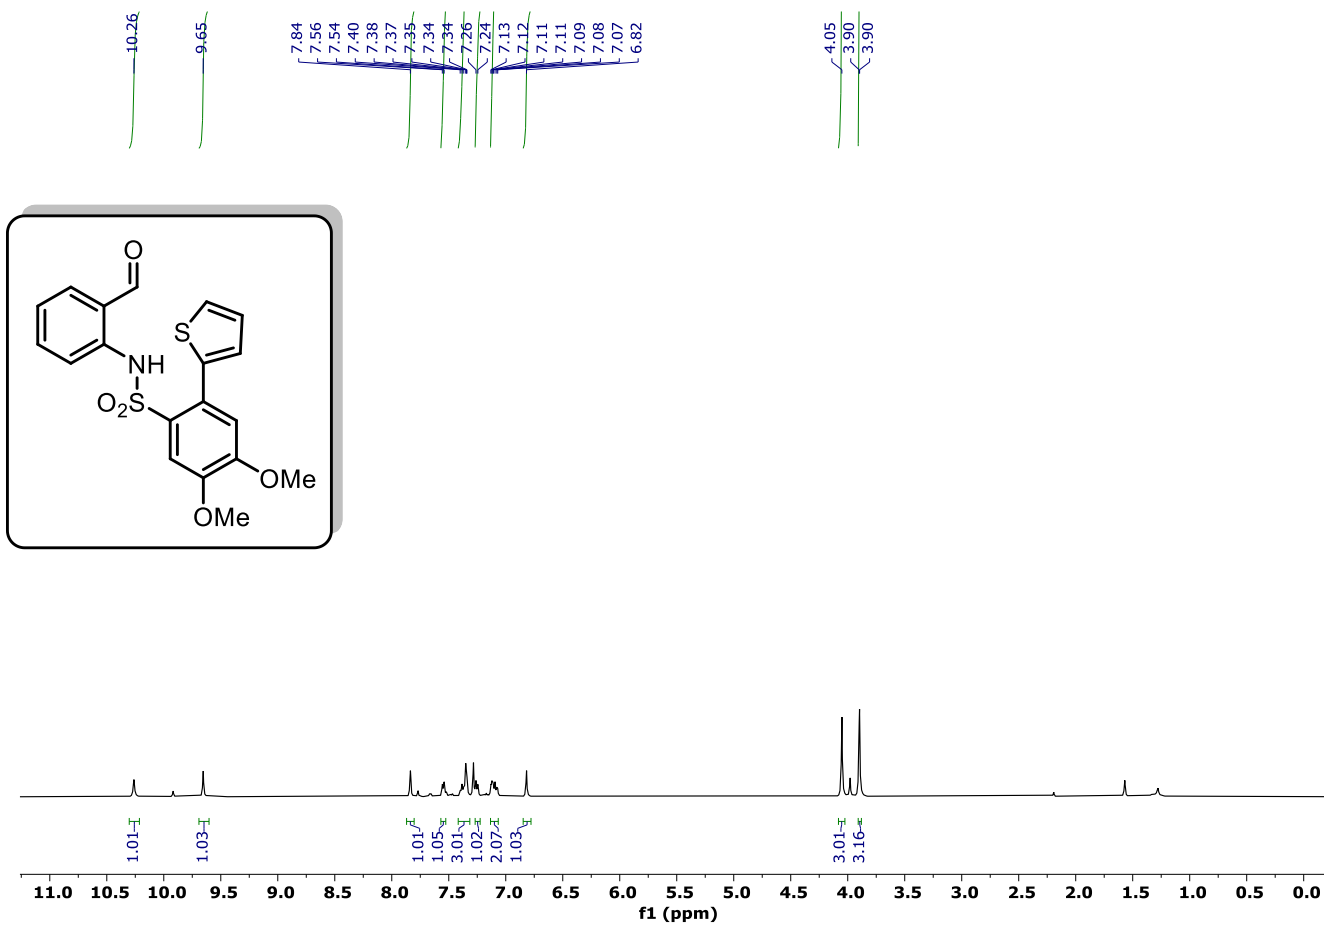

$^{13}\text{C}$  NMR spectrum of **8d** (126 MHz,  $\text{CDCl}_3$ )

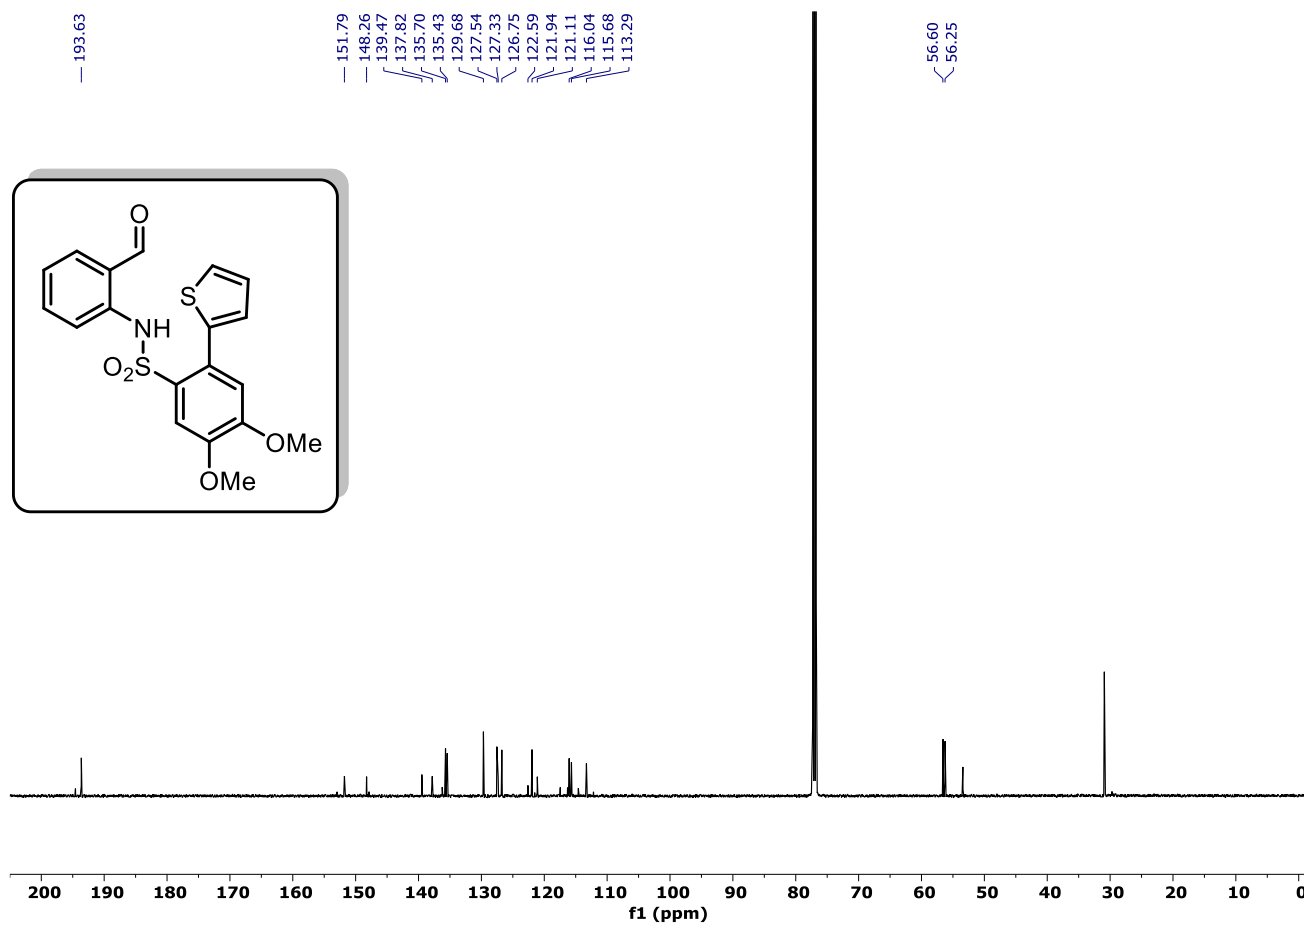

$^1\text{H}$  NMR spectrum of **10c** (500 MHz,  $\text{CDCl}_3$ )

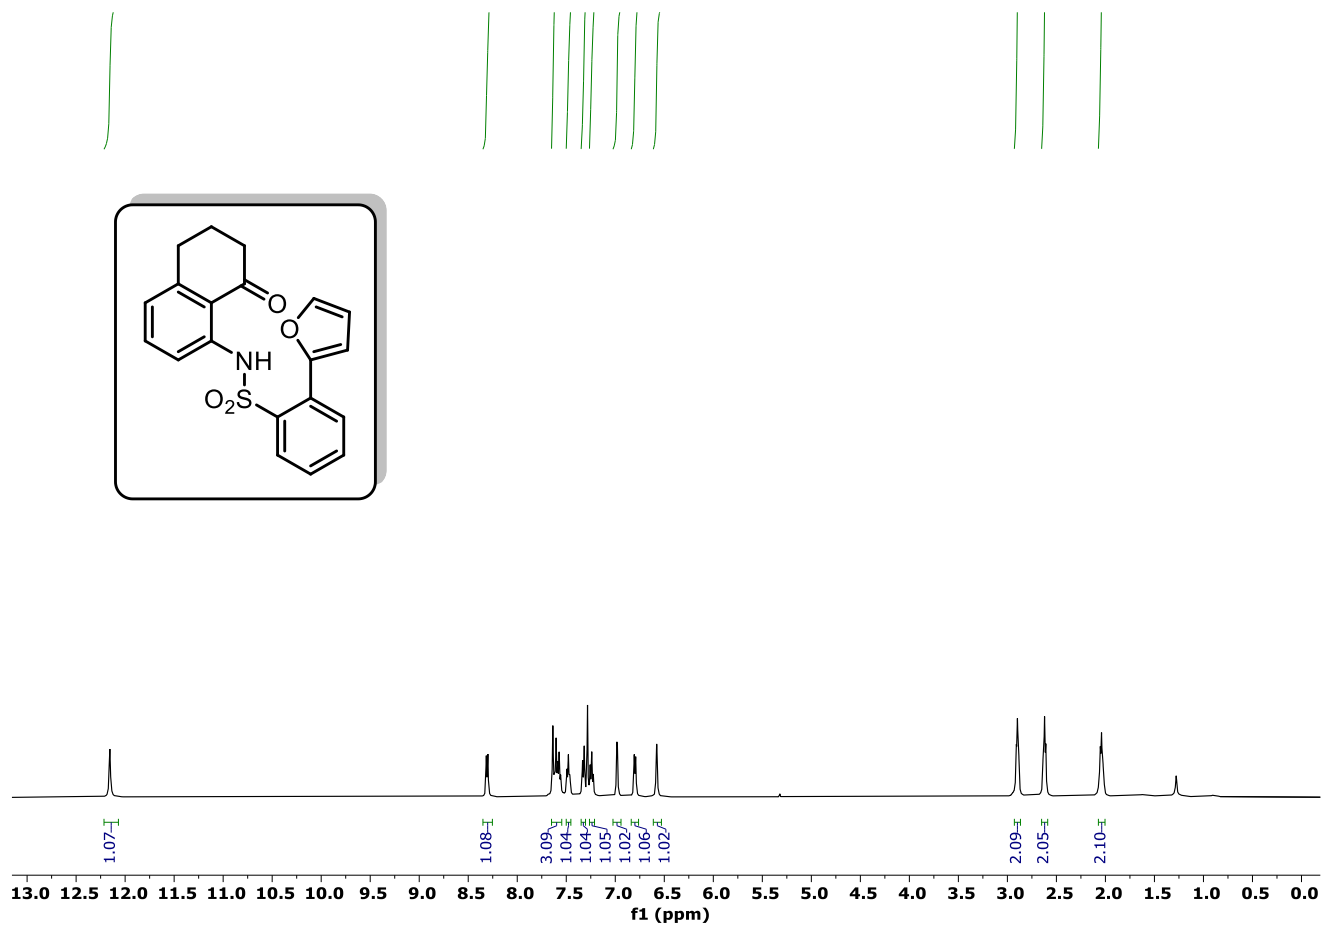

$^{13}\text{C}$  NMR spectrum of **10c** (126 MHz,  $\text{CDCl}_3$ )

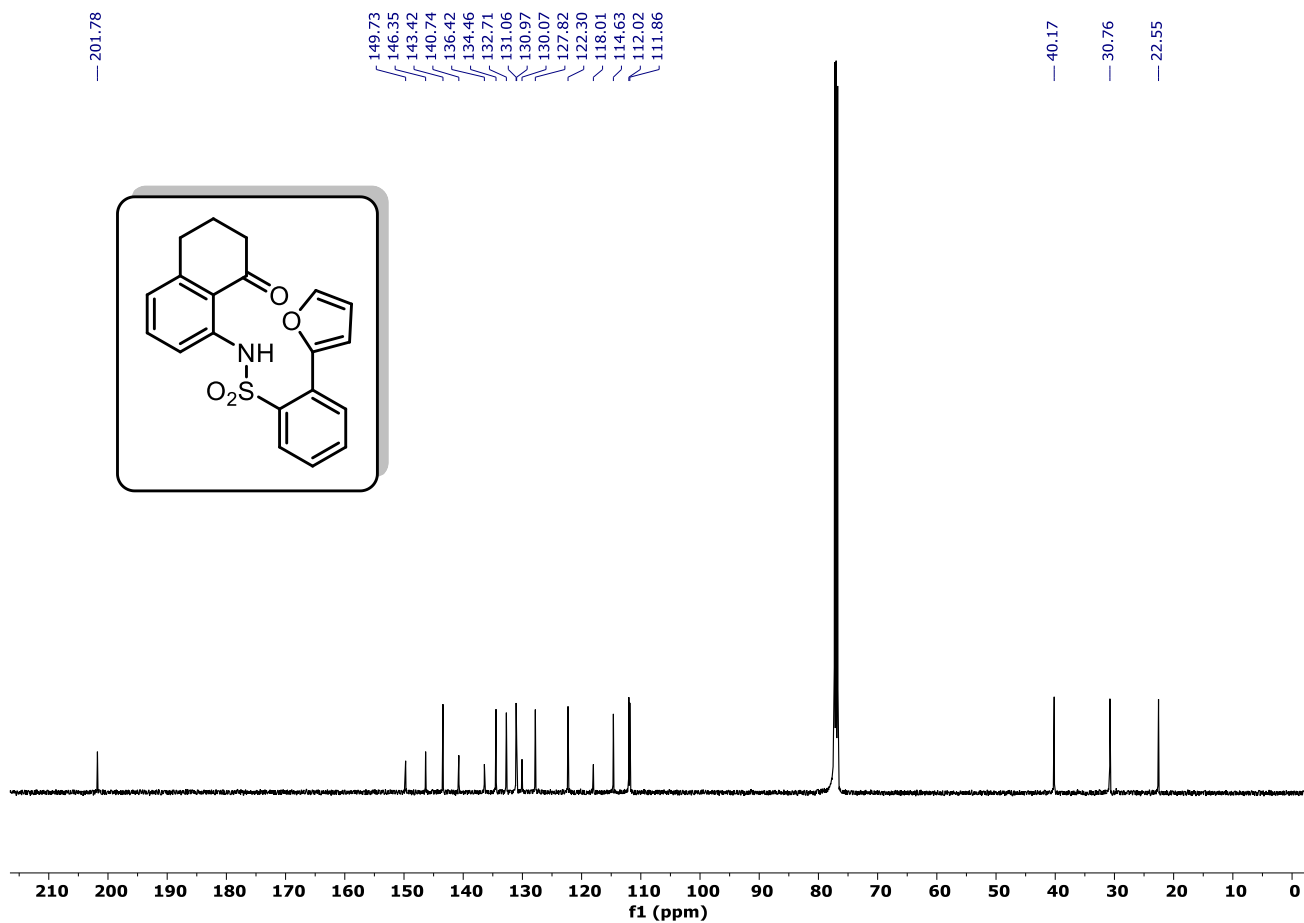

$^1\text{H}$  NMR spectrum of **11a** (500 MHz,  $\text{DMSO-}d_6$ )

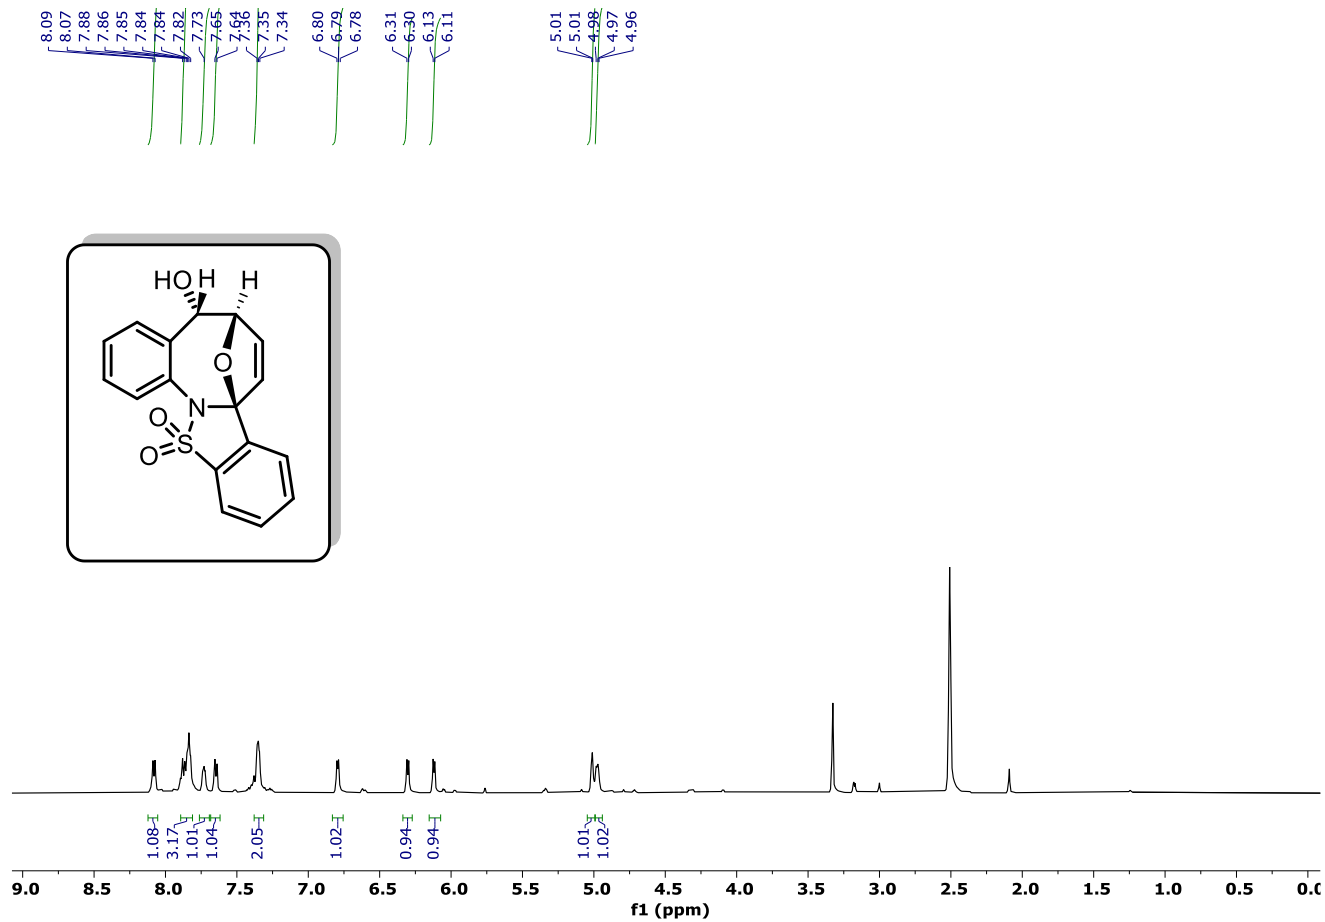

$^{13}\text{C}$  NMR spectrum of **11a** (126 MHz,  $\text{DMSO-}d_6$ )

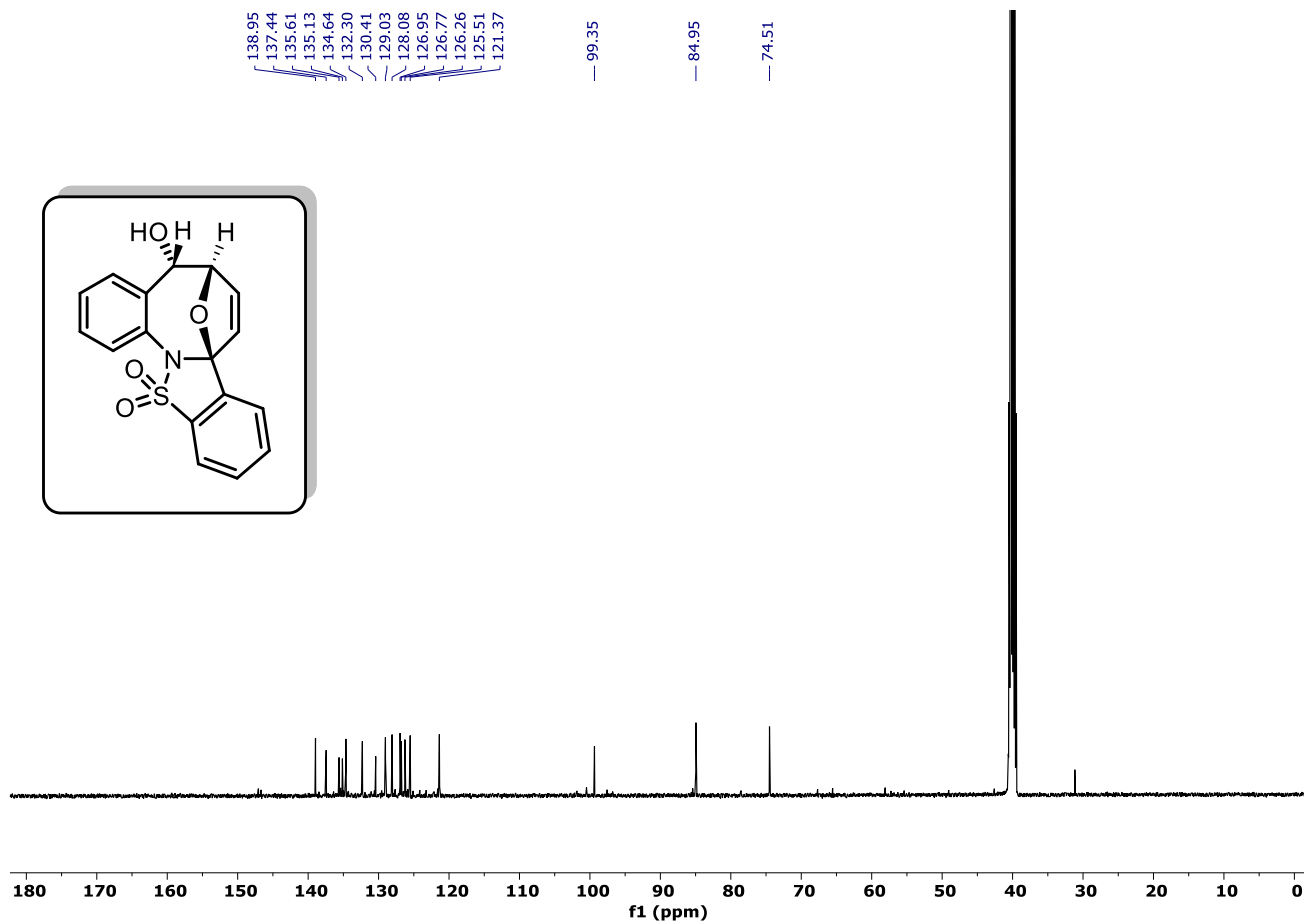

HSQC spectrum of **11a** (DMSO-*d*<sub>6</sub>)

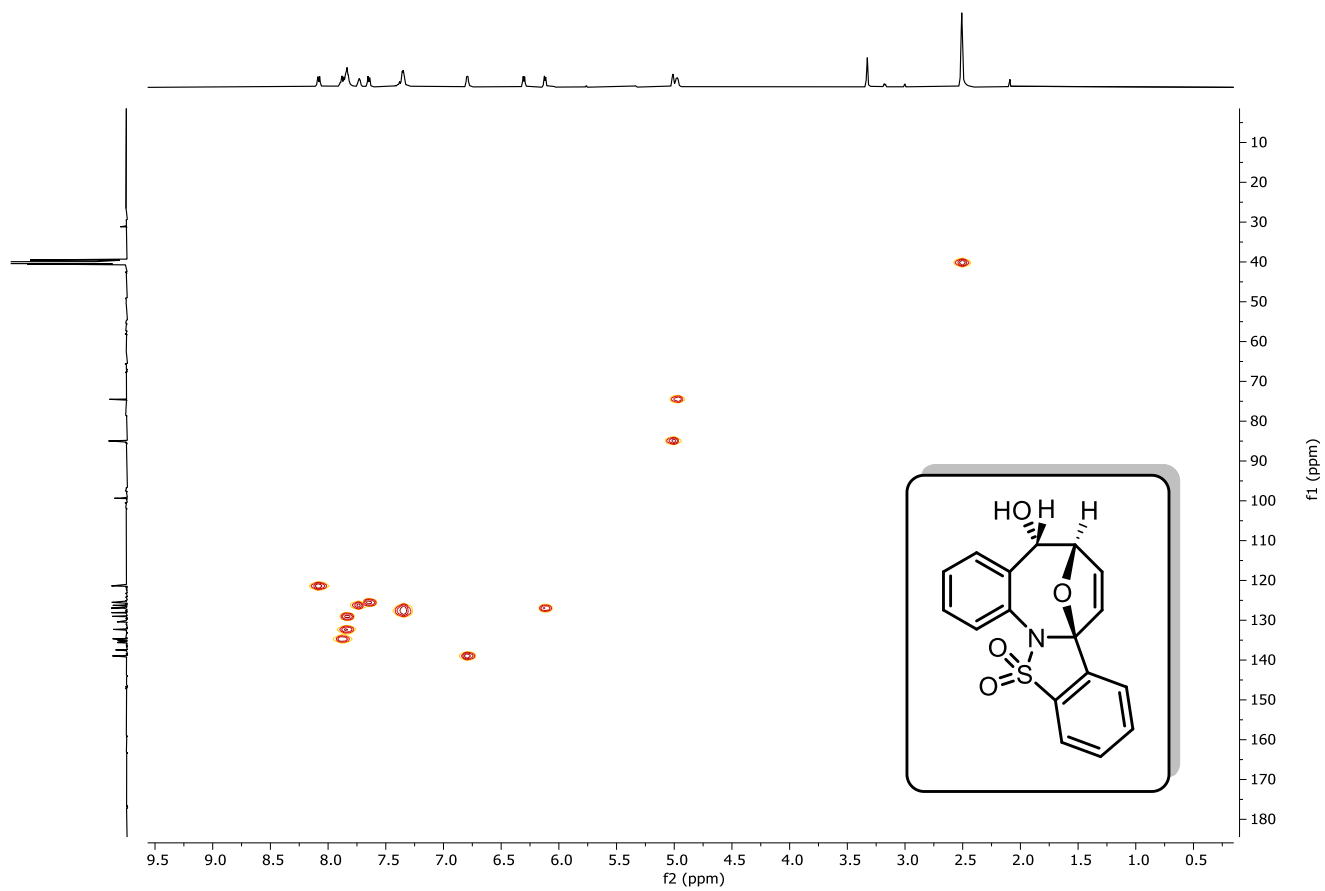

$^1\text{H}$  NMR spectrum of **11b** (500 MHz,  $\text{CDCl}_3$ )

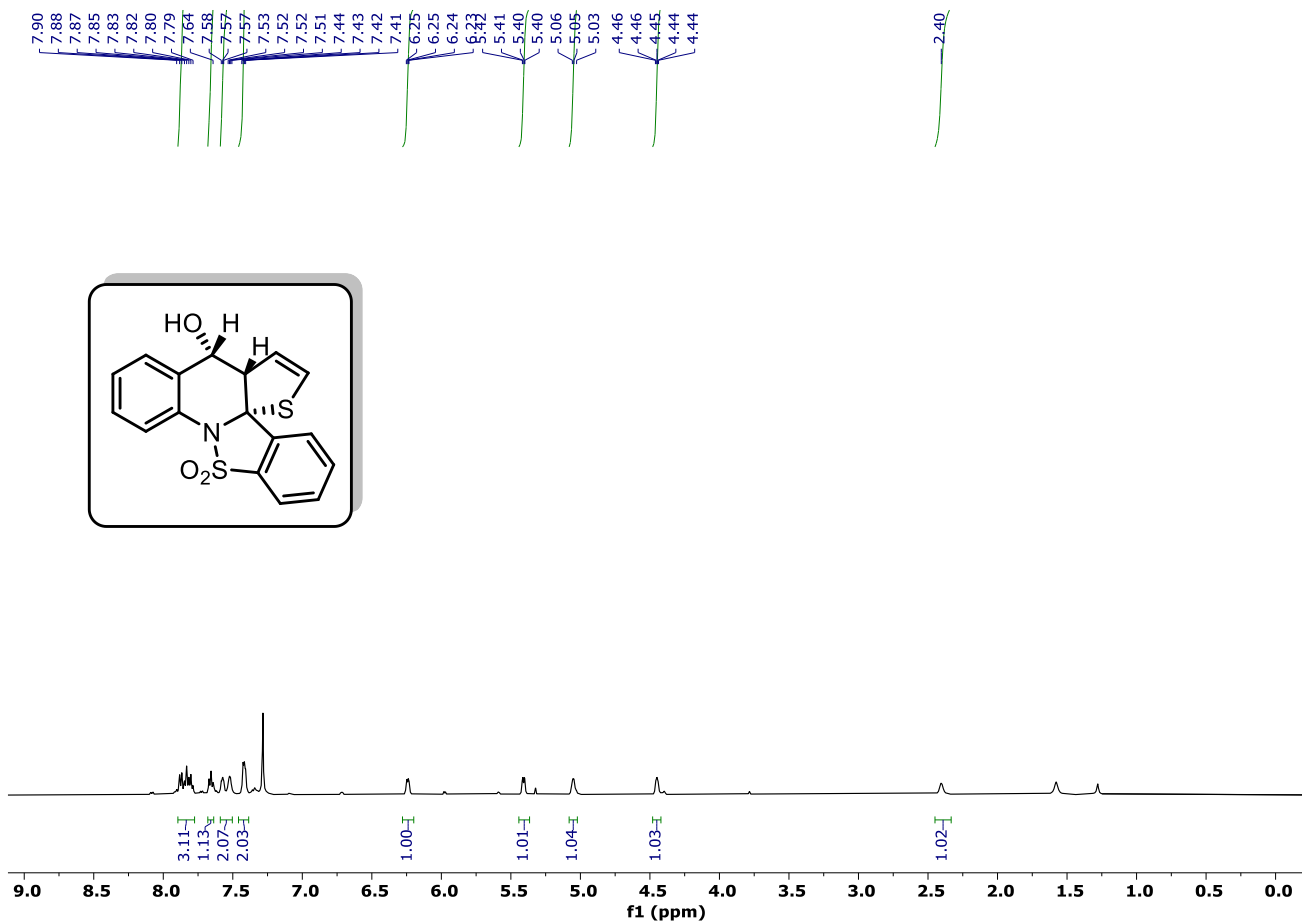

$^{13}\text{C}$  NMR spectrum of **11b** (126 MHz,  $\text{CDCl}_3$ )

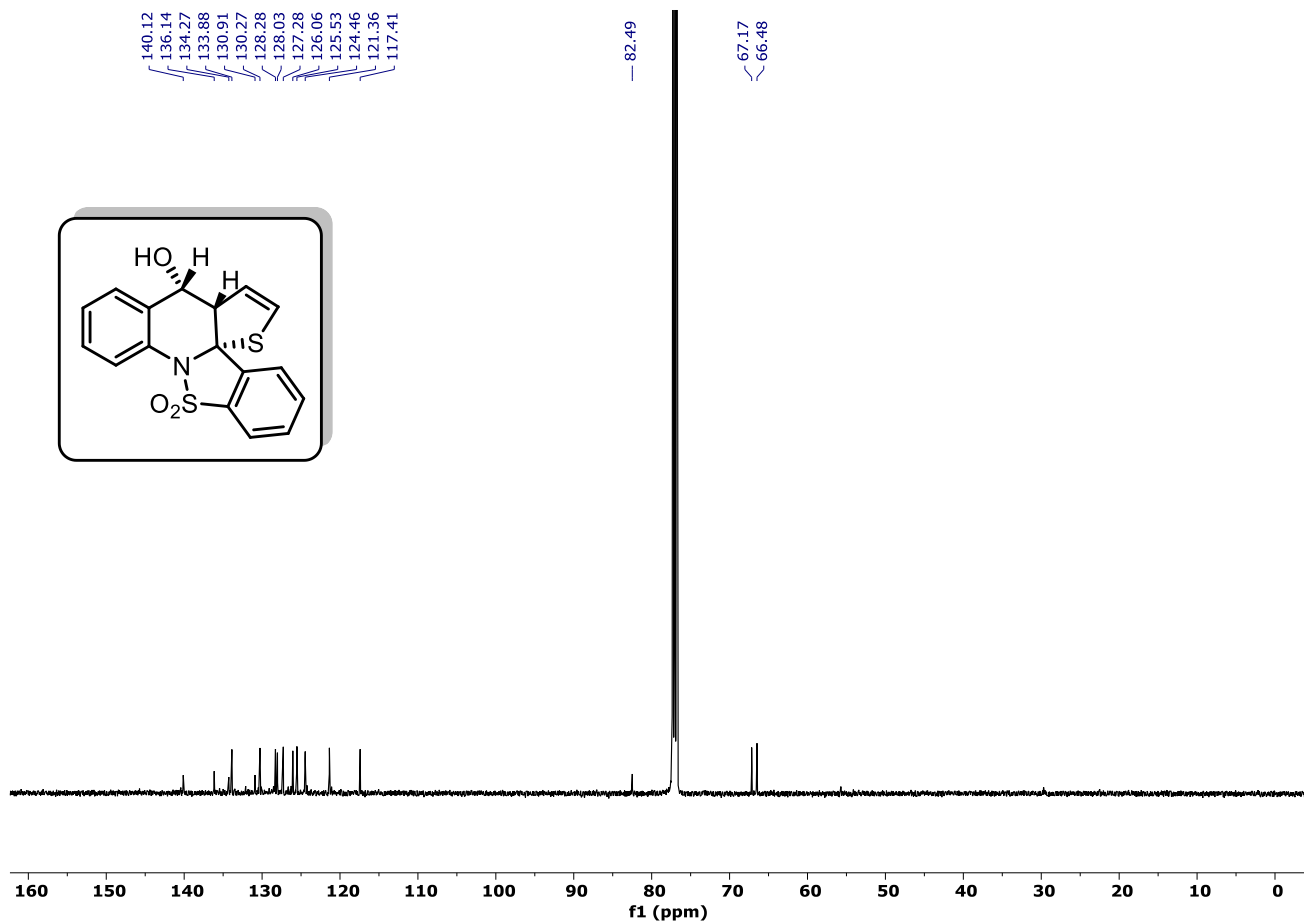

HSQC spectrum of **11b** (CDCl<sub>3</sub>)

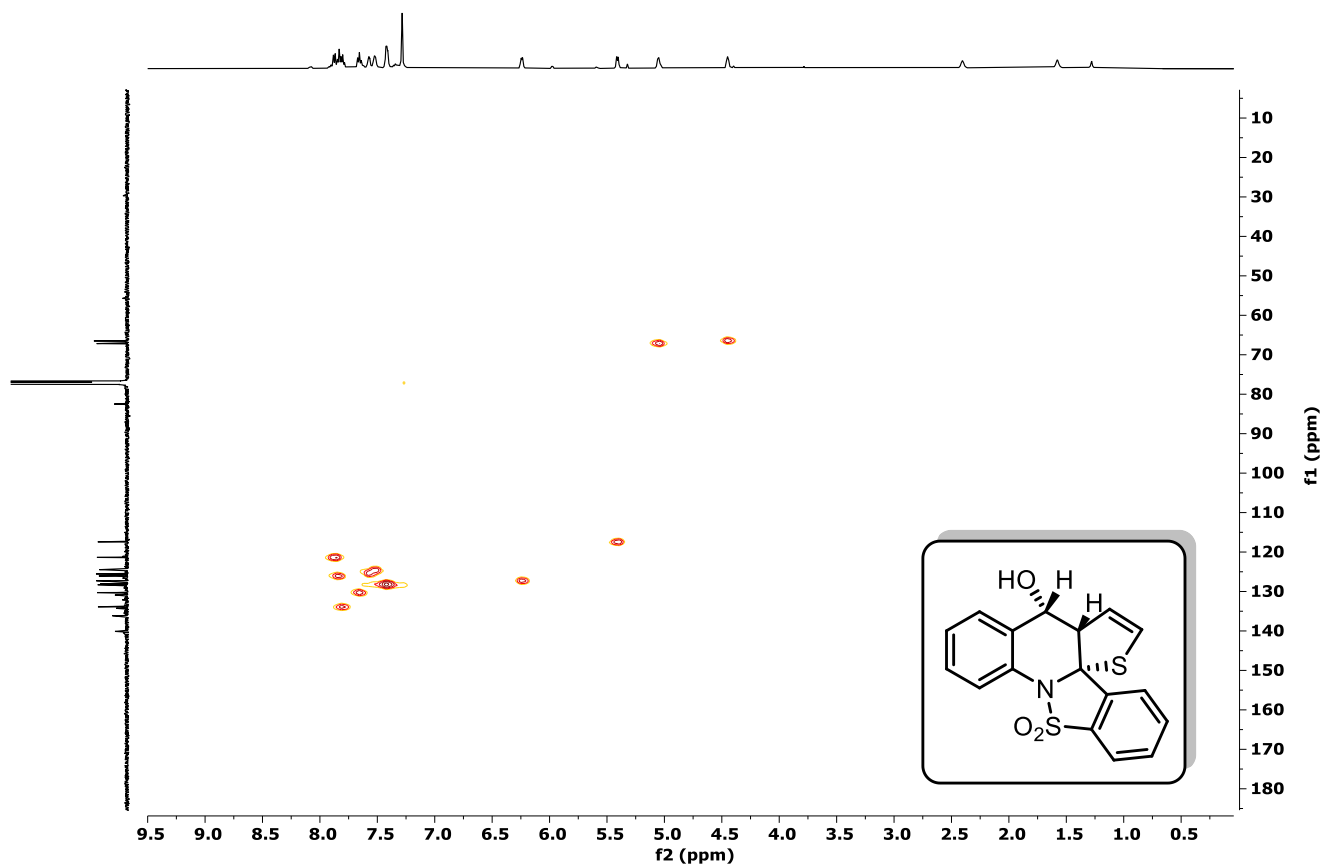

$^1\text{H}$  NMR spectrum of **11c** (500 MHz,  $\text{DMSO-}d_6$ )

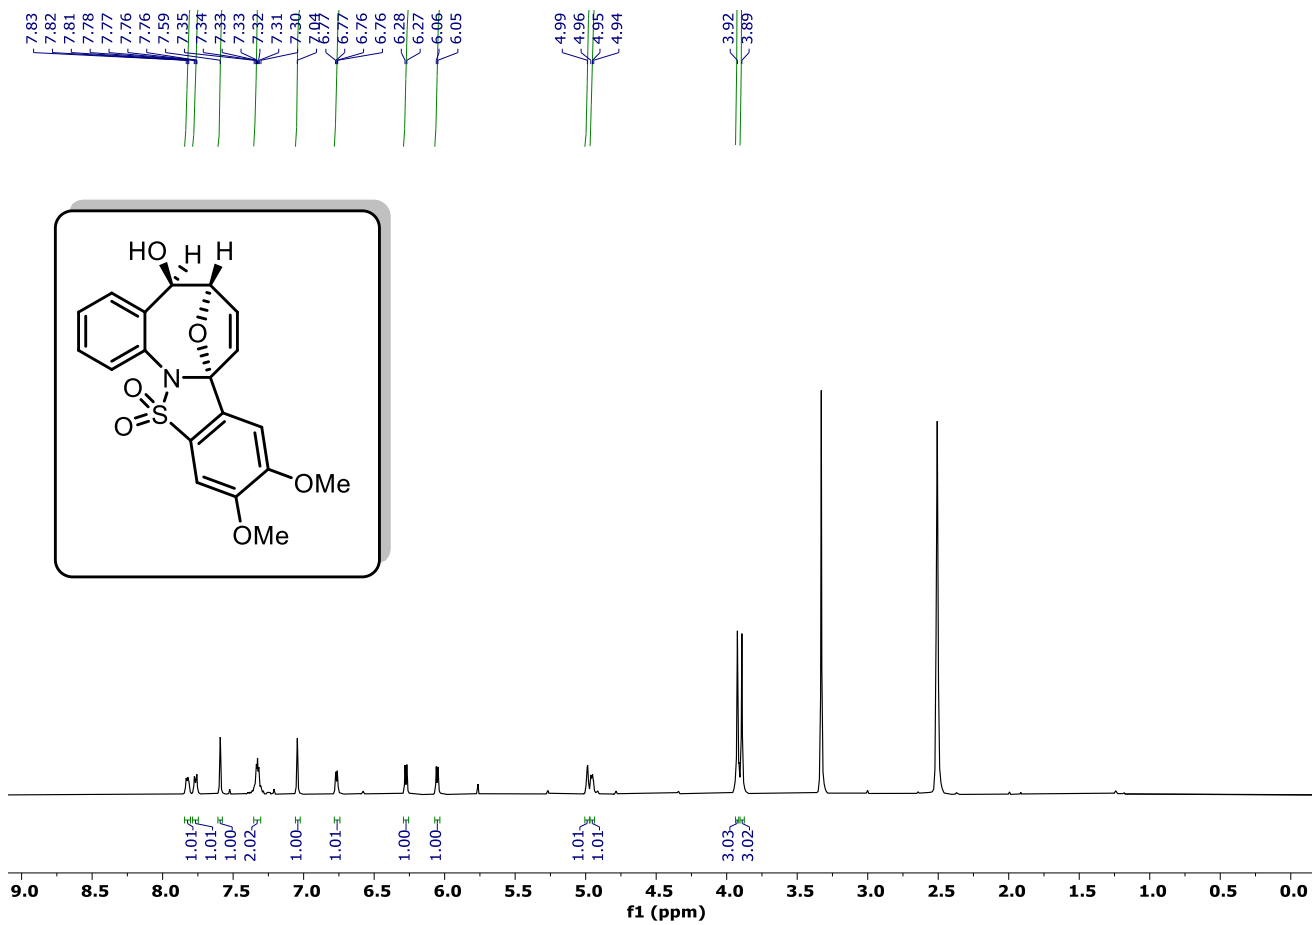

$^{13}\text{C}$  NMR spectrum of **11c** (126 MHz,  $\text{DMSO-}d_6$ )

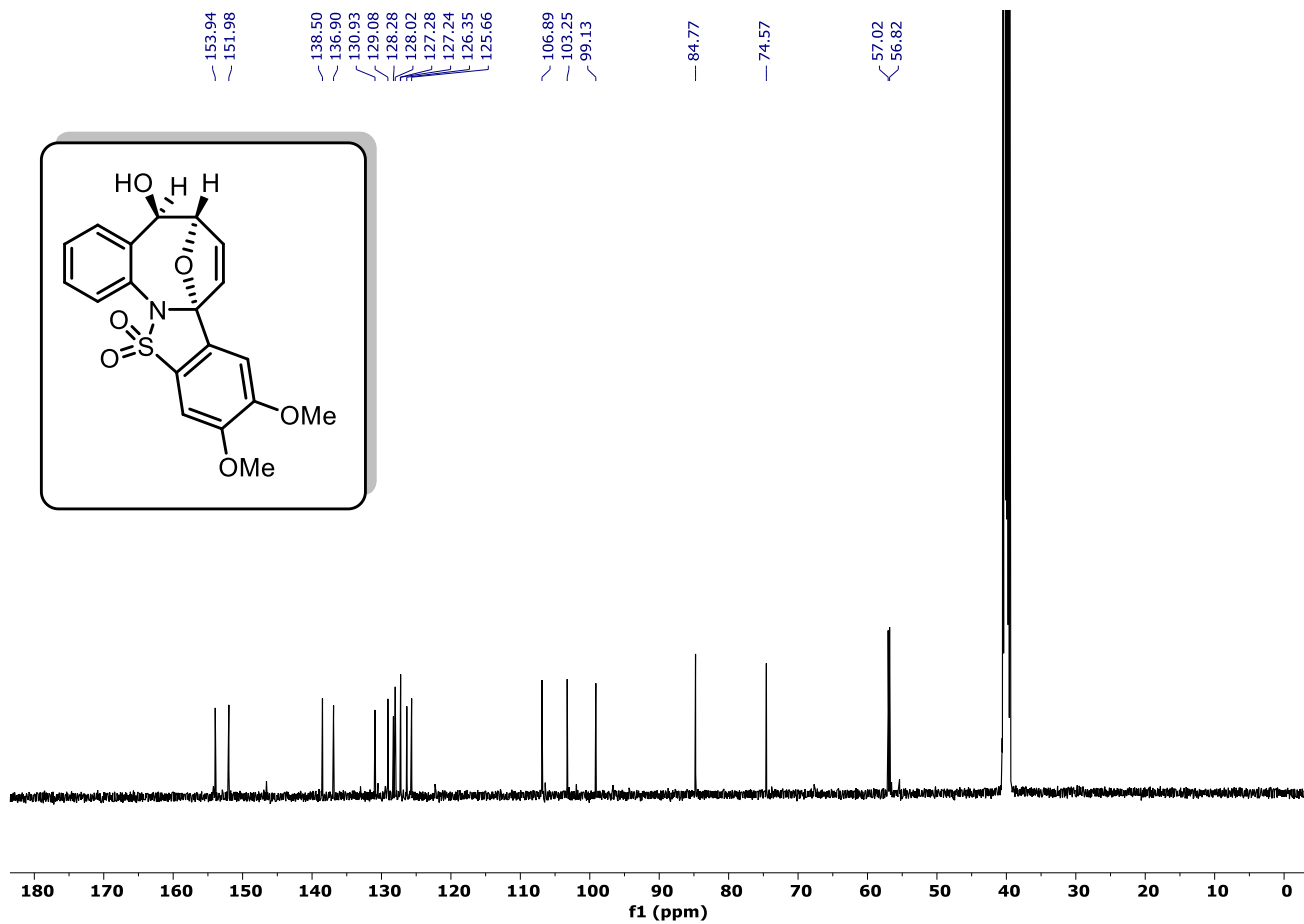

HSQC spectrum of **11c** (DMSO-*d*<sub>6</sub>)

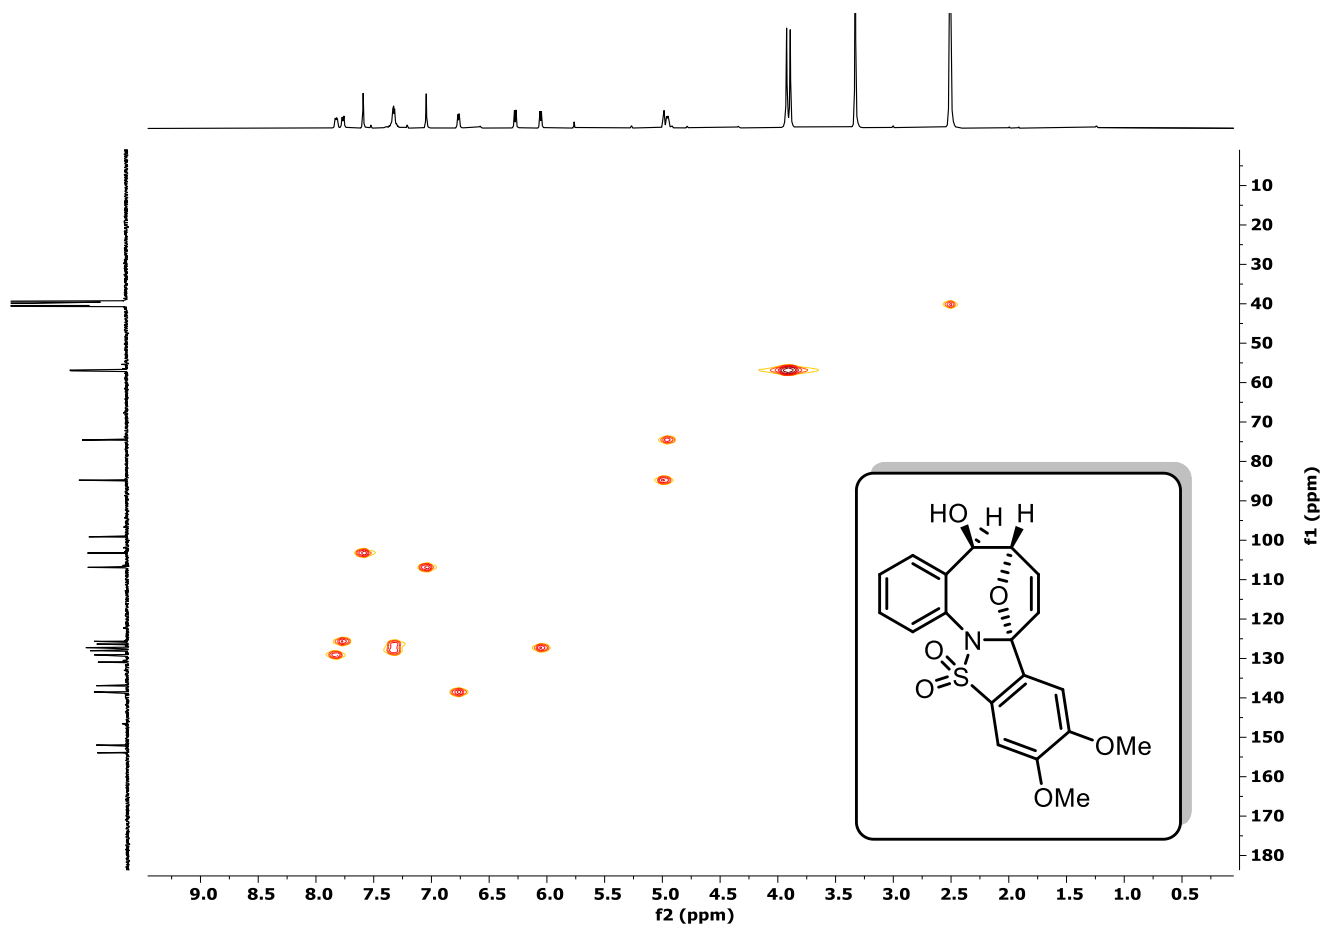

$^1\text{H}$  NMR spectrum of **11d** (500 MHz,  $\text{CDCl}_3$ )

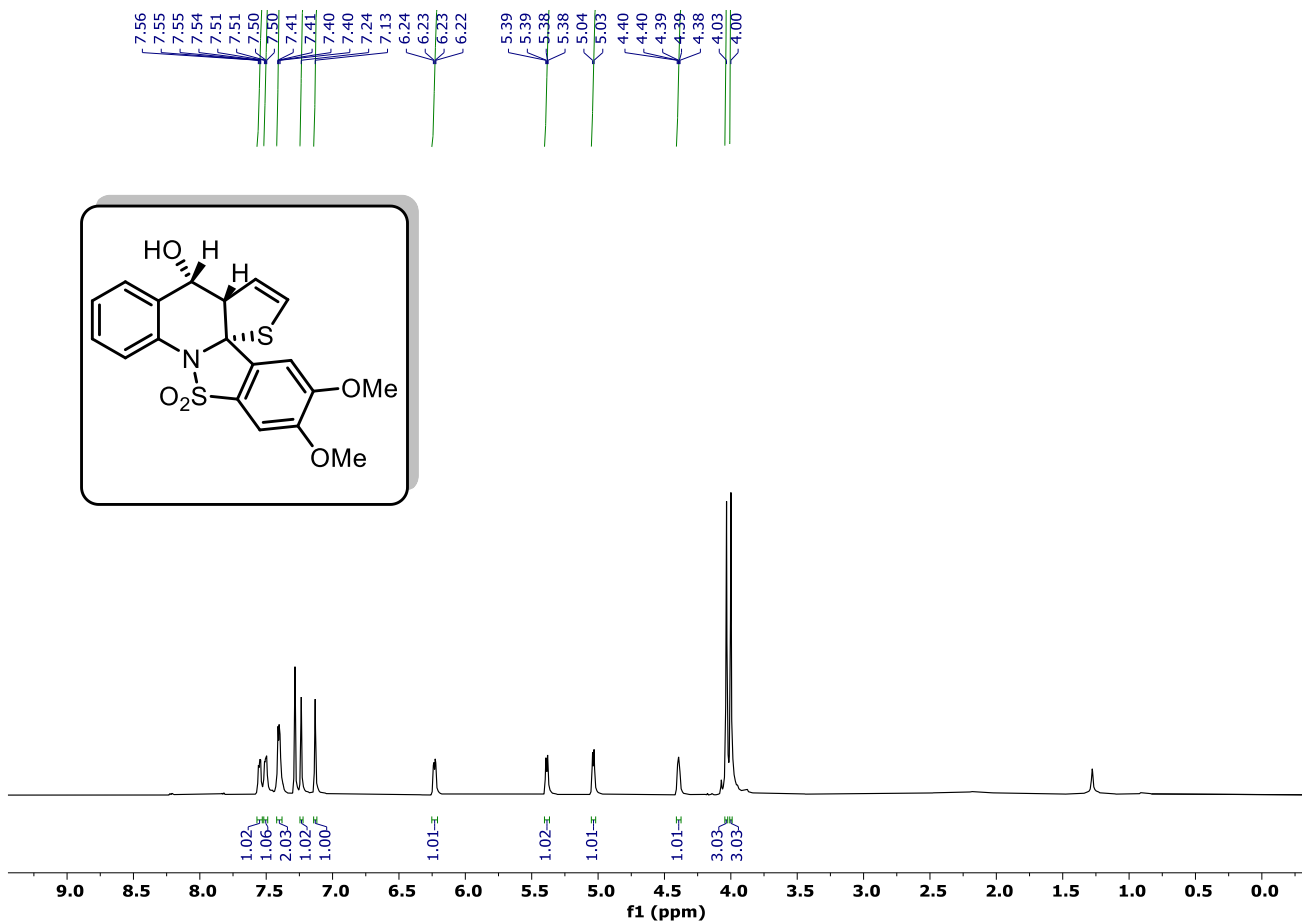

$^{13}\text{C}$  NMR spectrum of **11d** (126 MHz,  $\text{CDCl}_3$ )

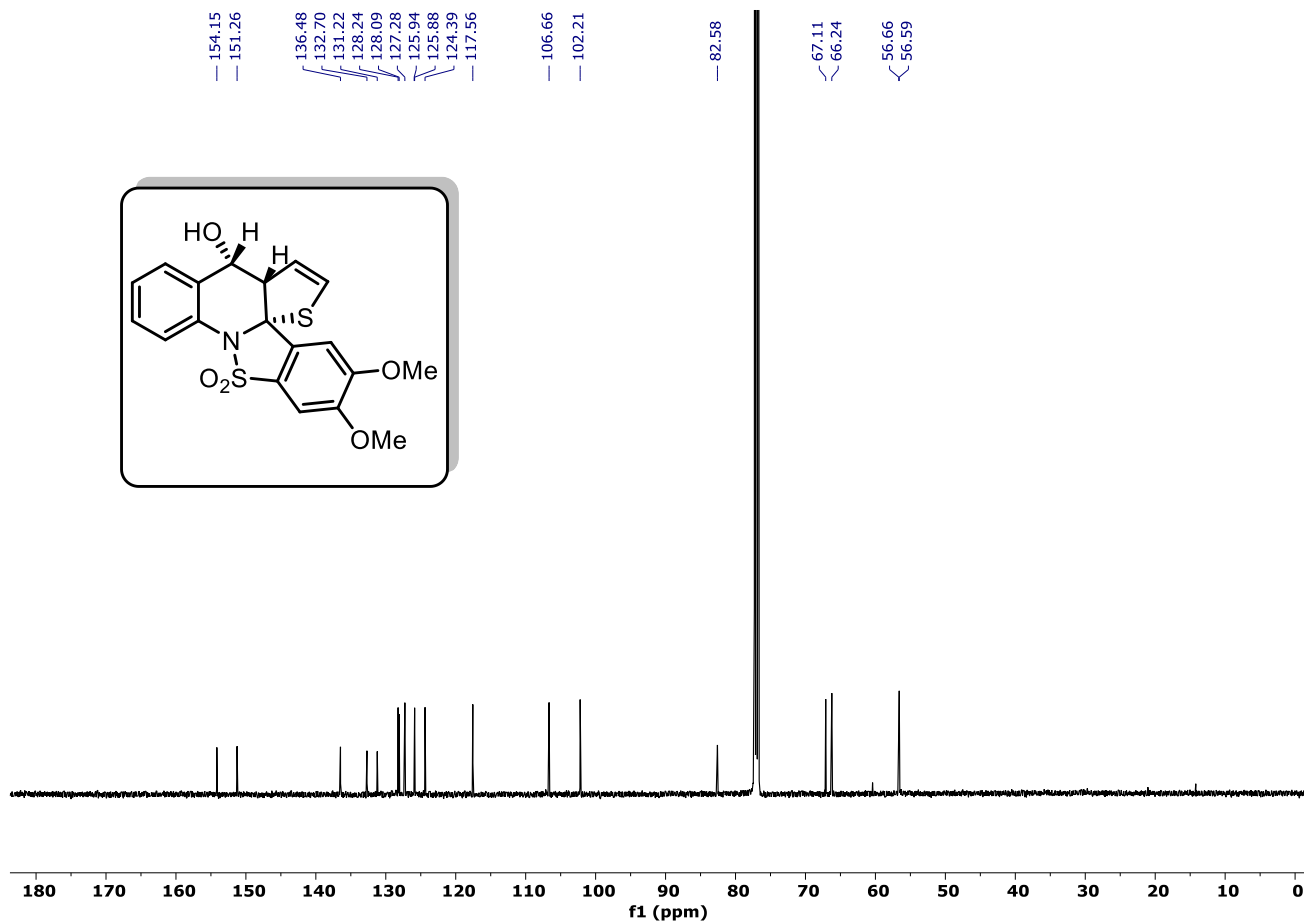

HSQC spectrum of **11d** (CDCl<sub>3</sub>)

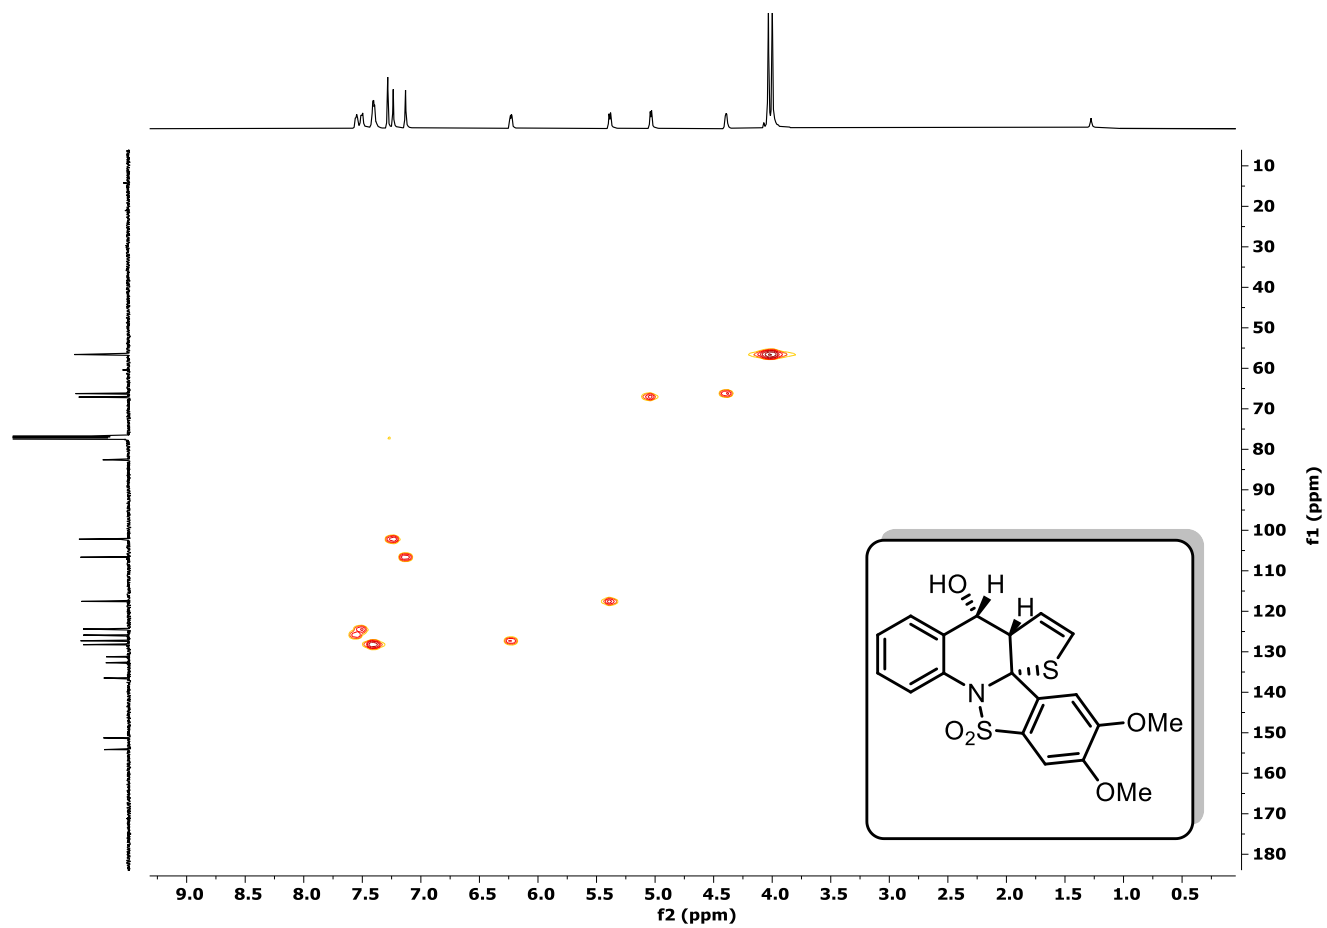

$^1\text{H}$  NMR spectrum of **11e** (Major; 500 MHz,  $\text{CDCl}_3$ )

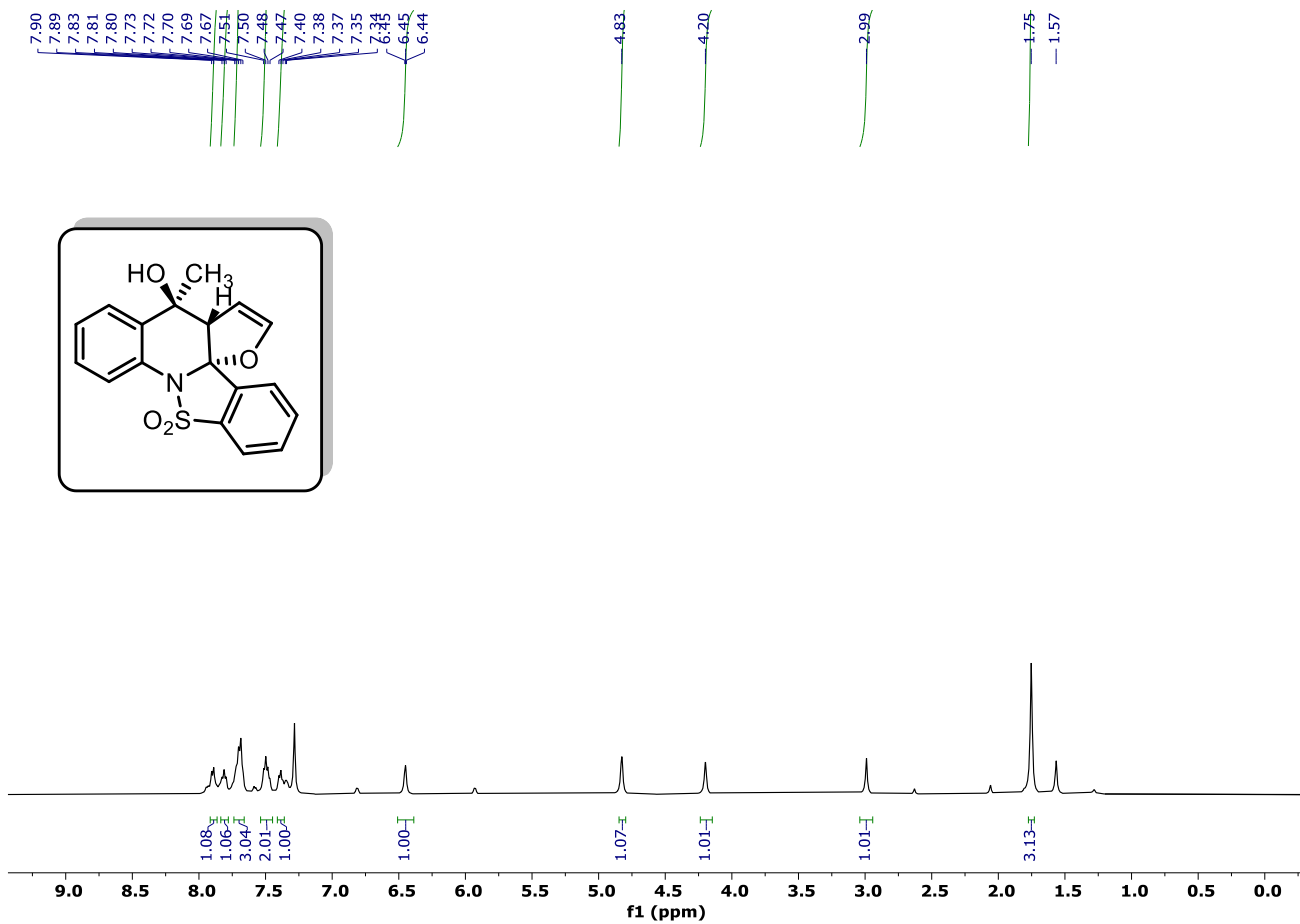

$^{13}\text{C}$  NMR spectrum of **11e** (126 MHz,  $\text{CDCl}_3$ )

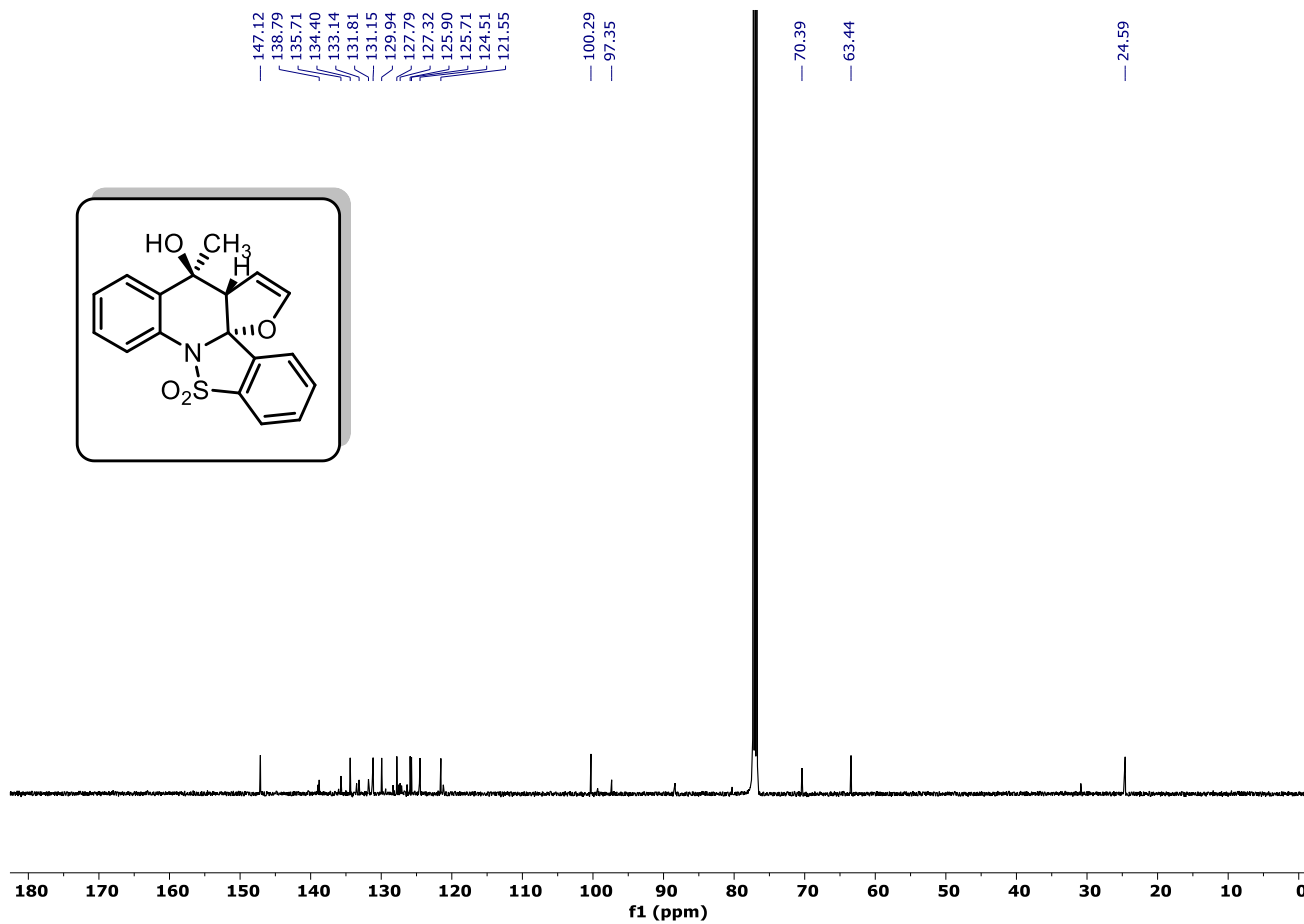

HSQC spectrum of **11e** (CDCl<sub>3</sub>)

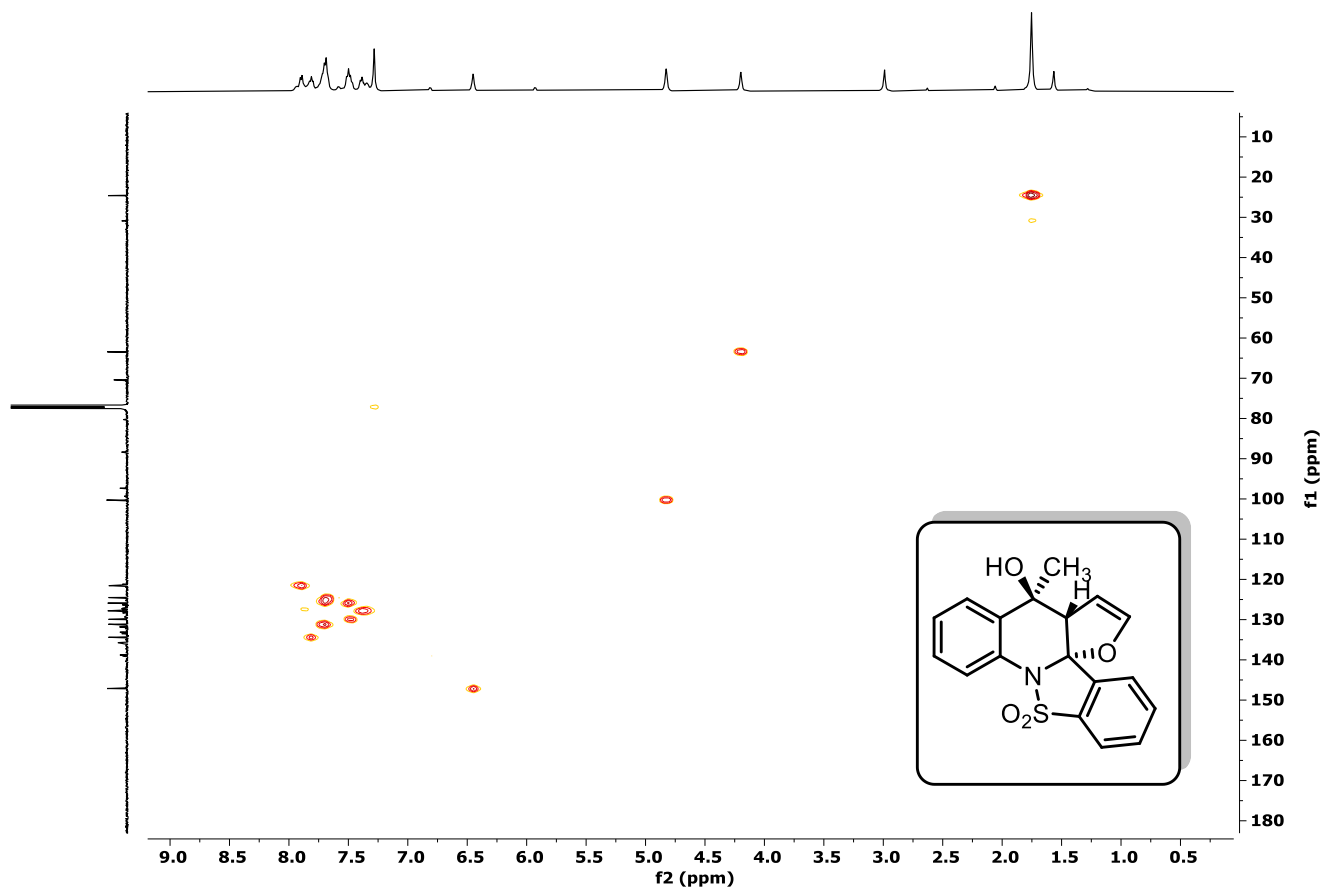

$^1\text{H}$  NMR spectrum of **11ea** (500 MHz,  $\text{CDCl}_3$ )

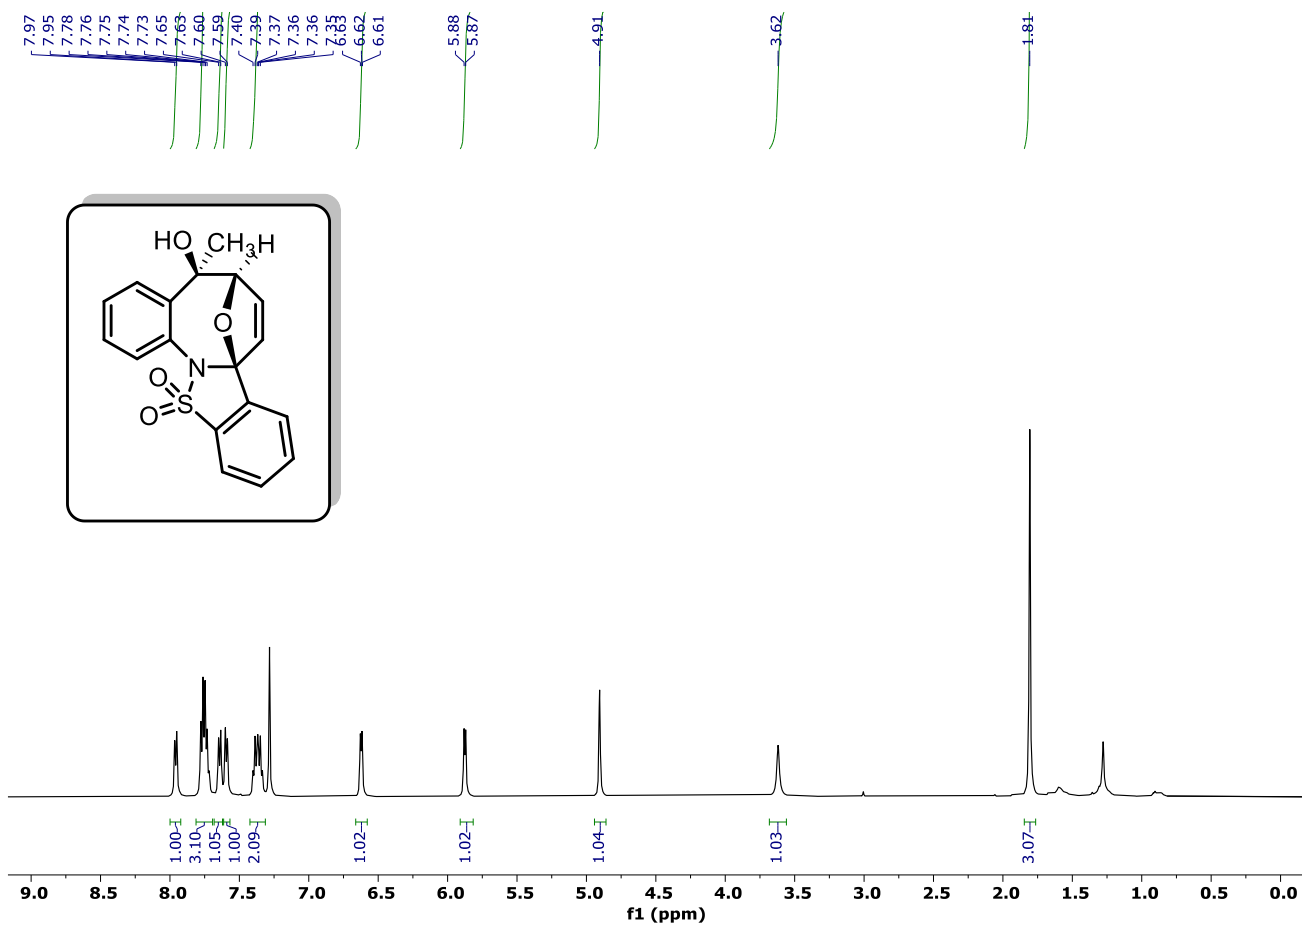

$^{13}\text{C}$  NMR spectrum of **11ea** (126 MHz,  $\text{CDCl}_3$ )

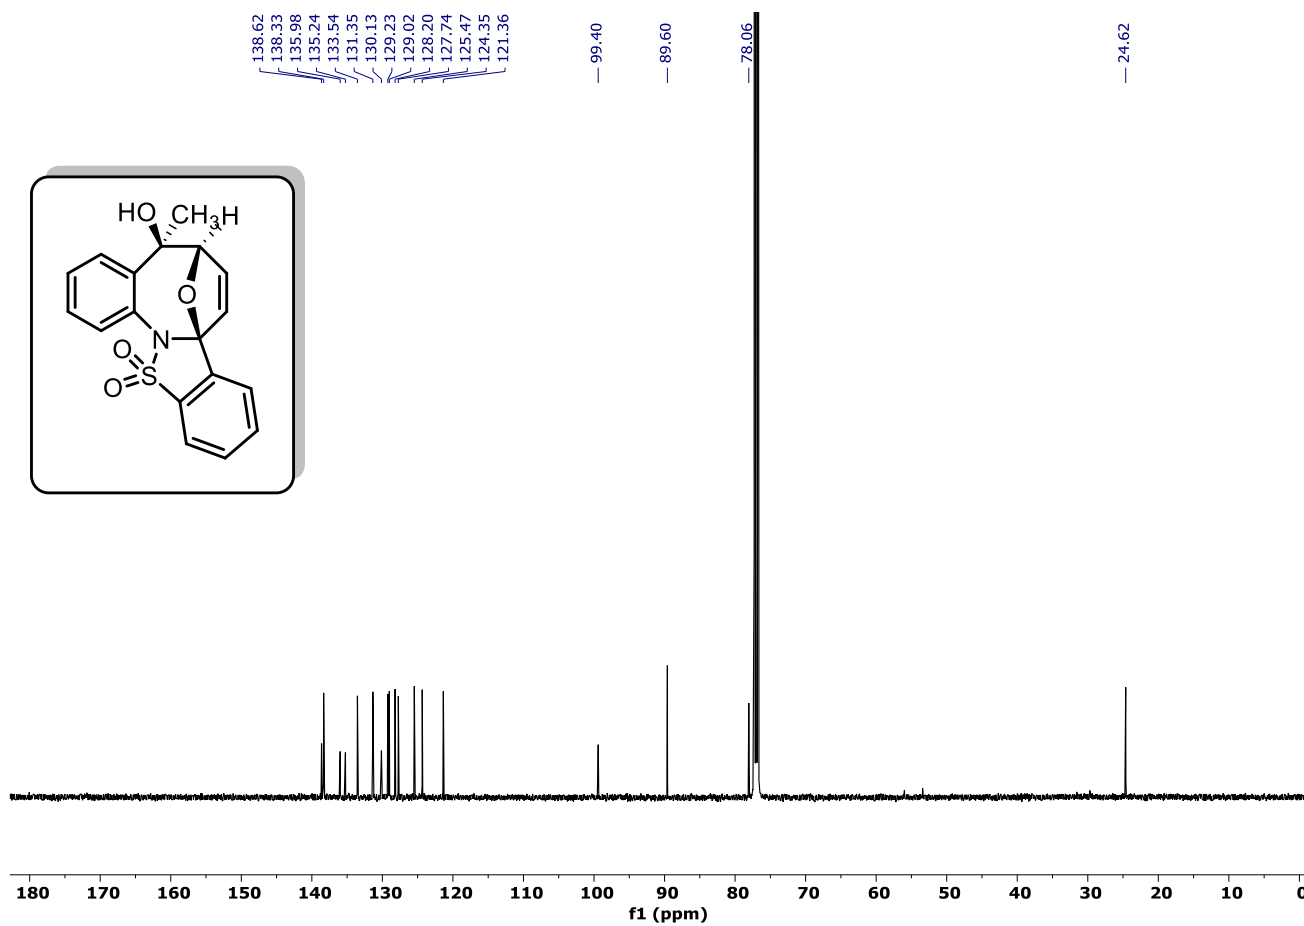

HSQC spectrum of **11ea** (CDCl<sub>3</sub>)

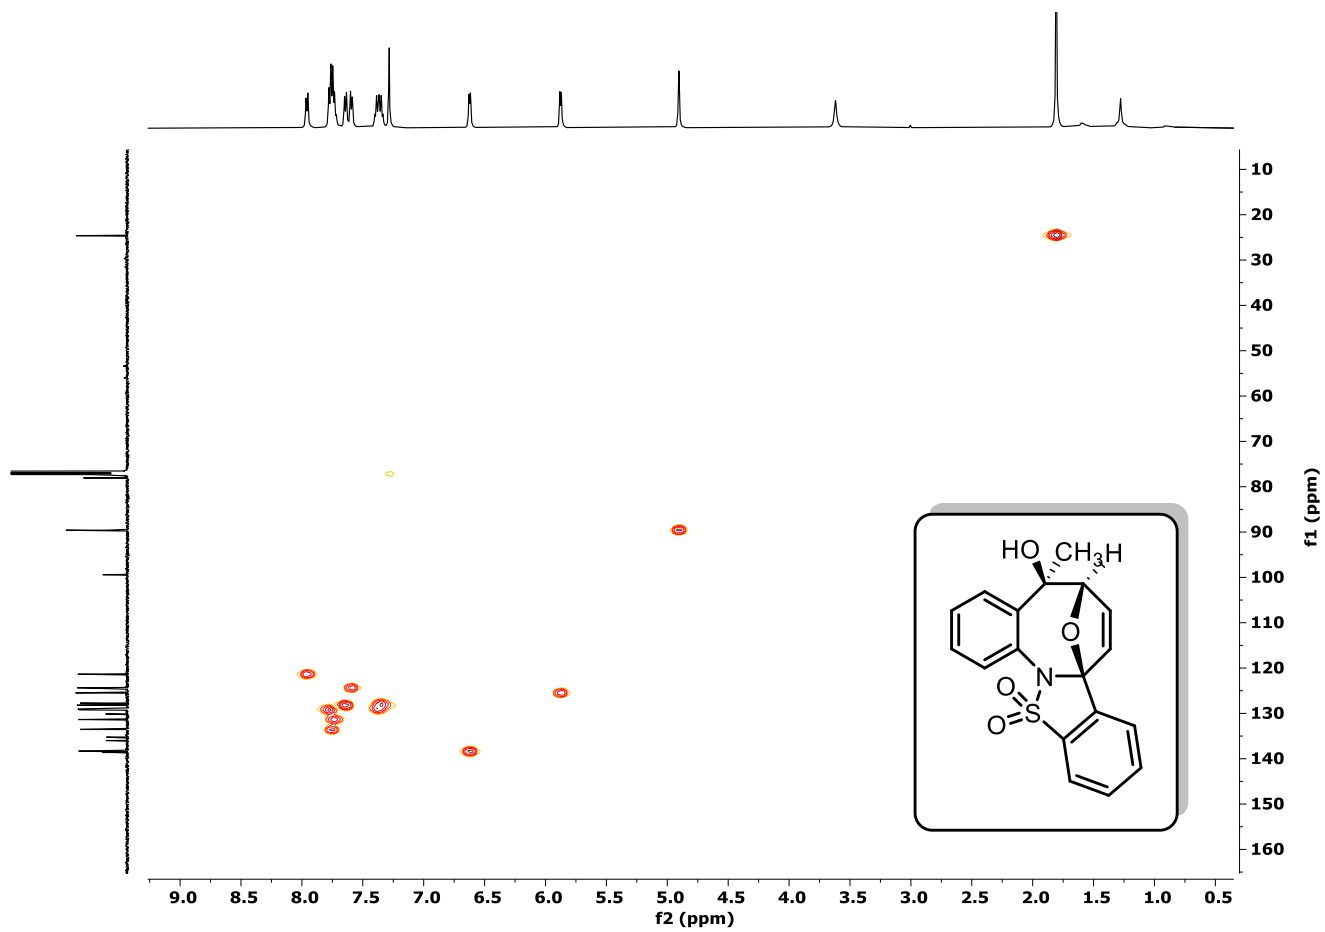

$^1\text{H}$  NMR spectrum of **11f** (500 MHz,  $\text{CDCl}_3$ )

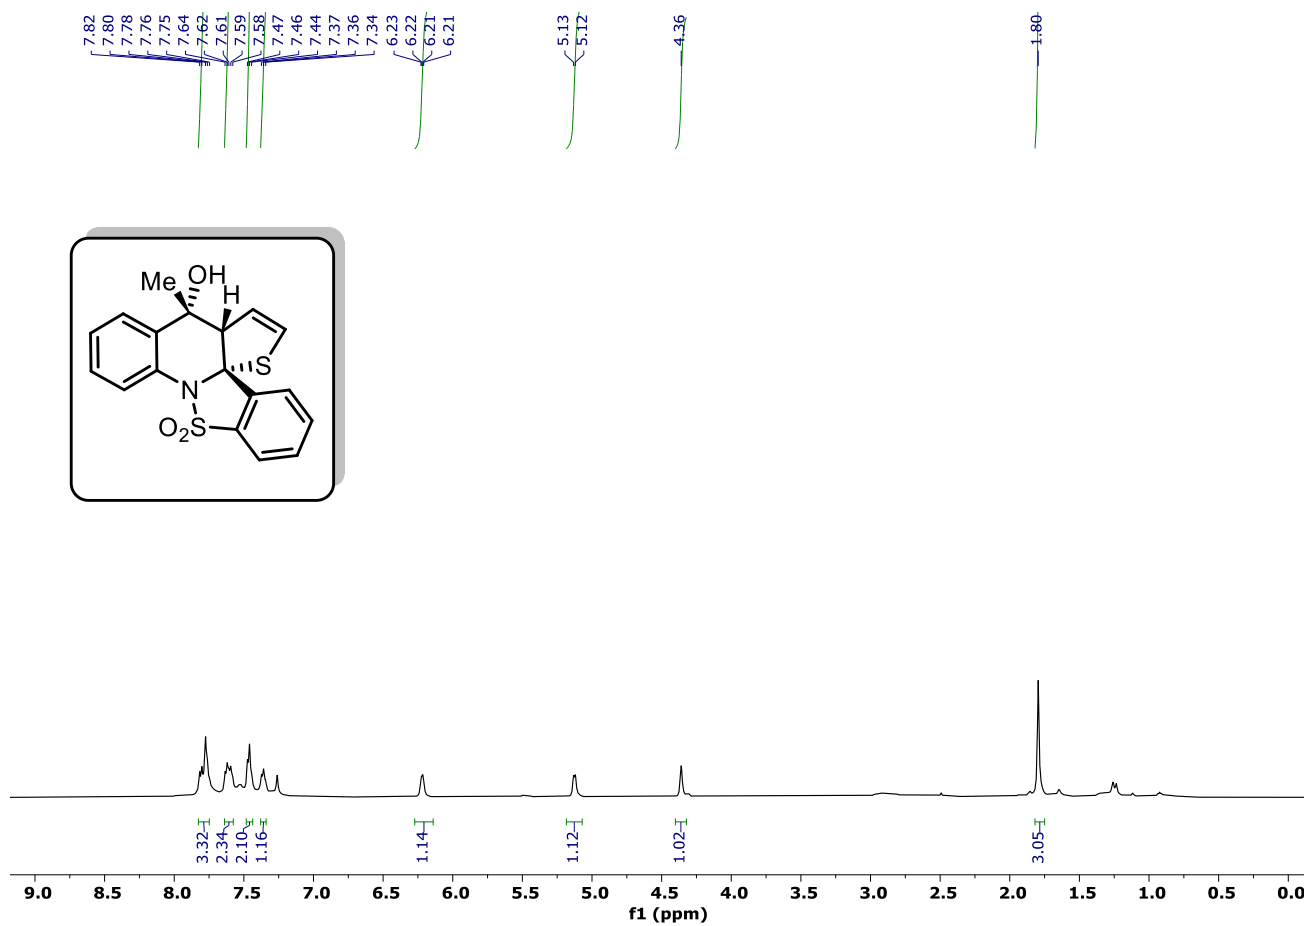

$^{13}\text{C}$  NMR spectrum of **11f** (126 MHz,  $\text{CDCl}_3$ )

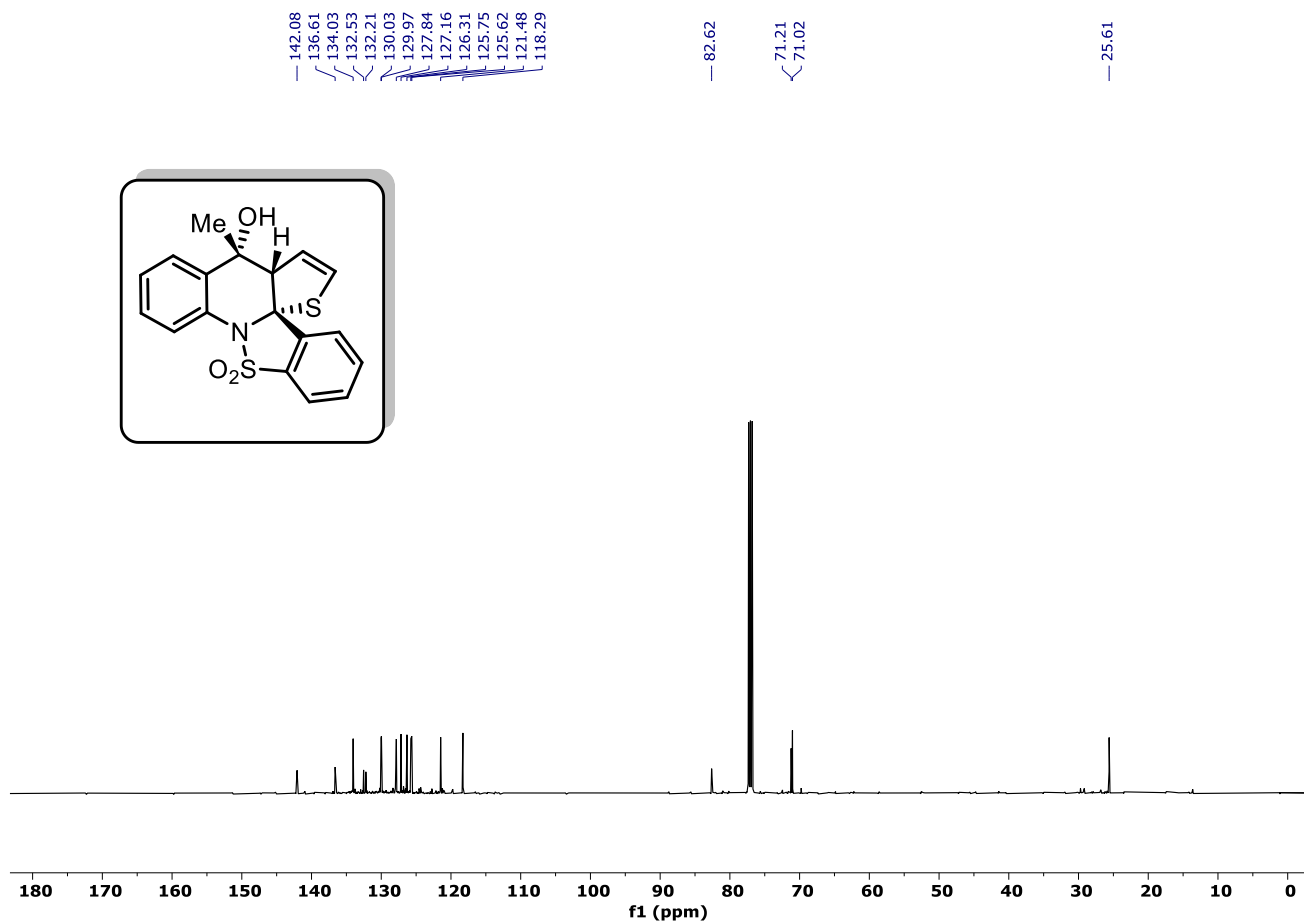

HSQC spectrum of **11f** (CDCl<sub>3</sub>)

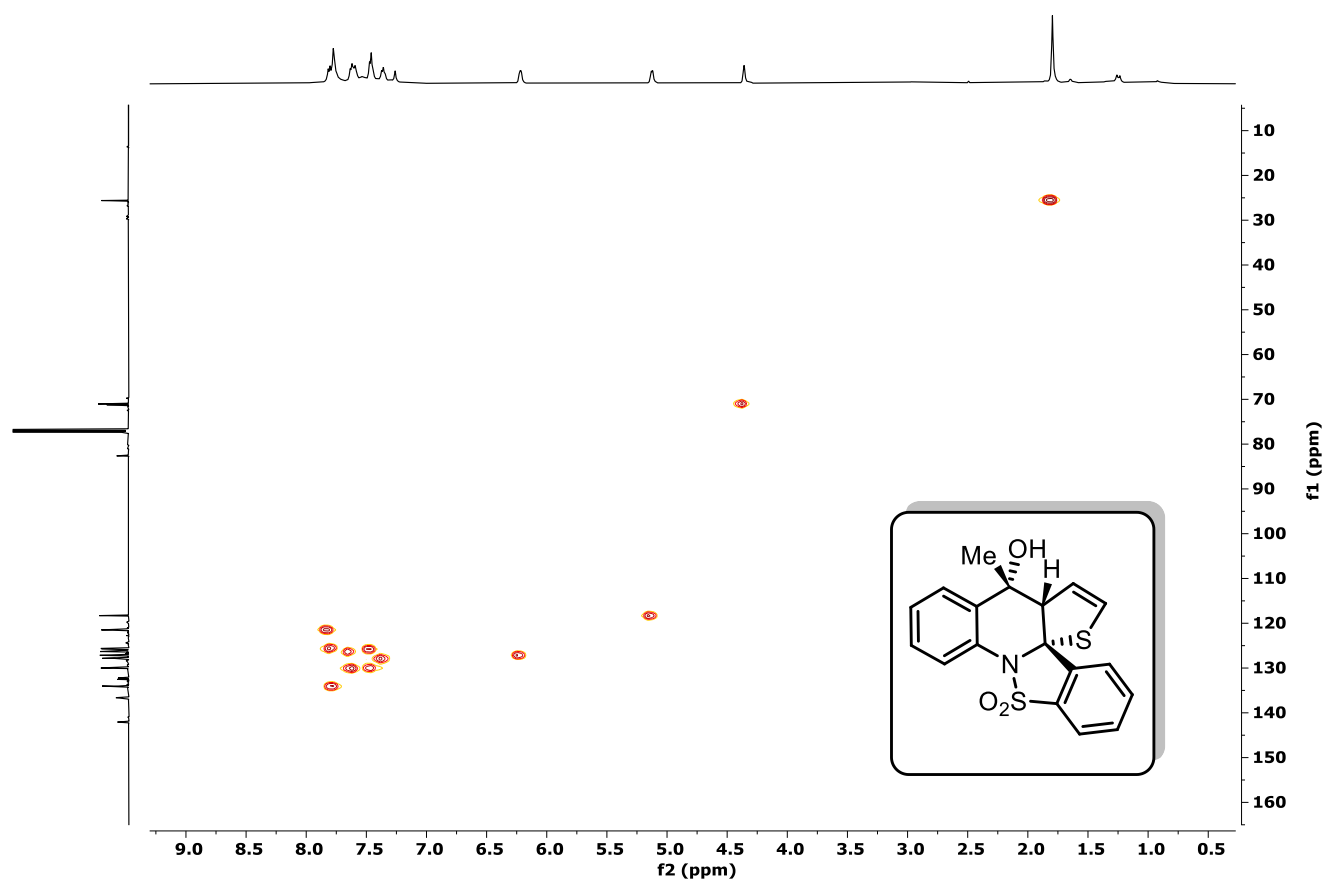

$^1\text{H}$  NMR spectrum of **11g** (500 MHz,  $\text{CDCl}_3$ )

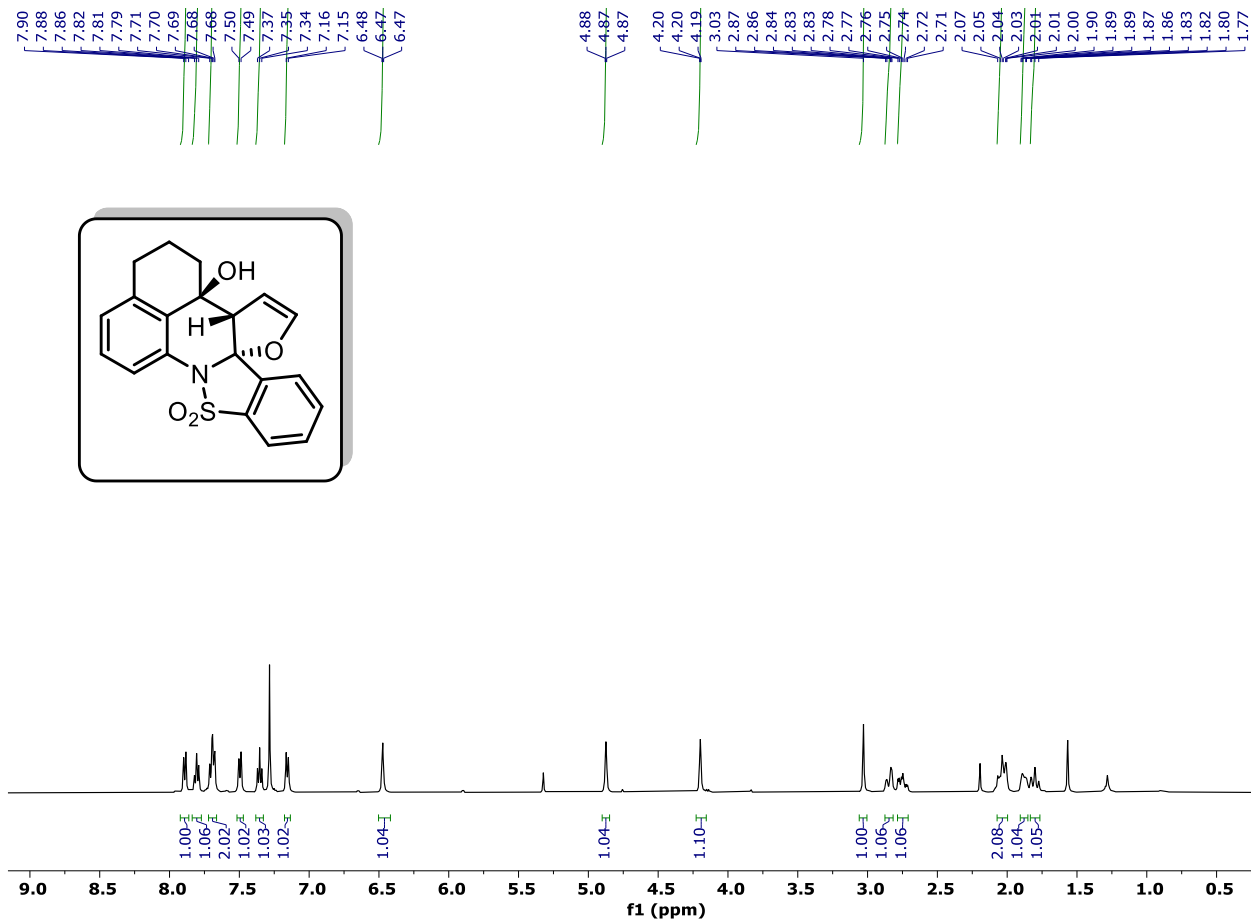

$^{13}\text{C}$  NMR spectrum of **11g** (126 MHz,  $\text{CDCl}_3$ )

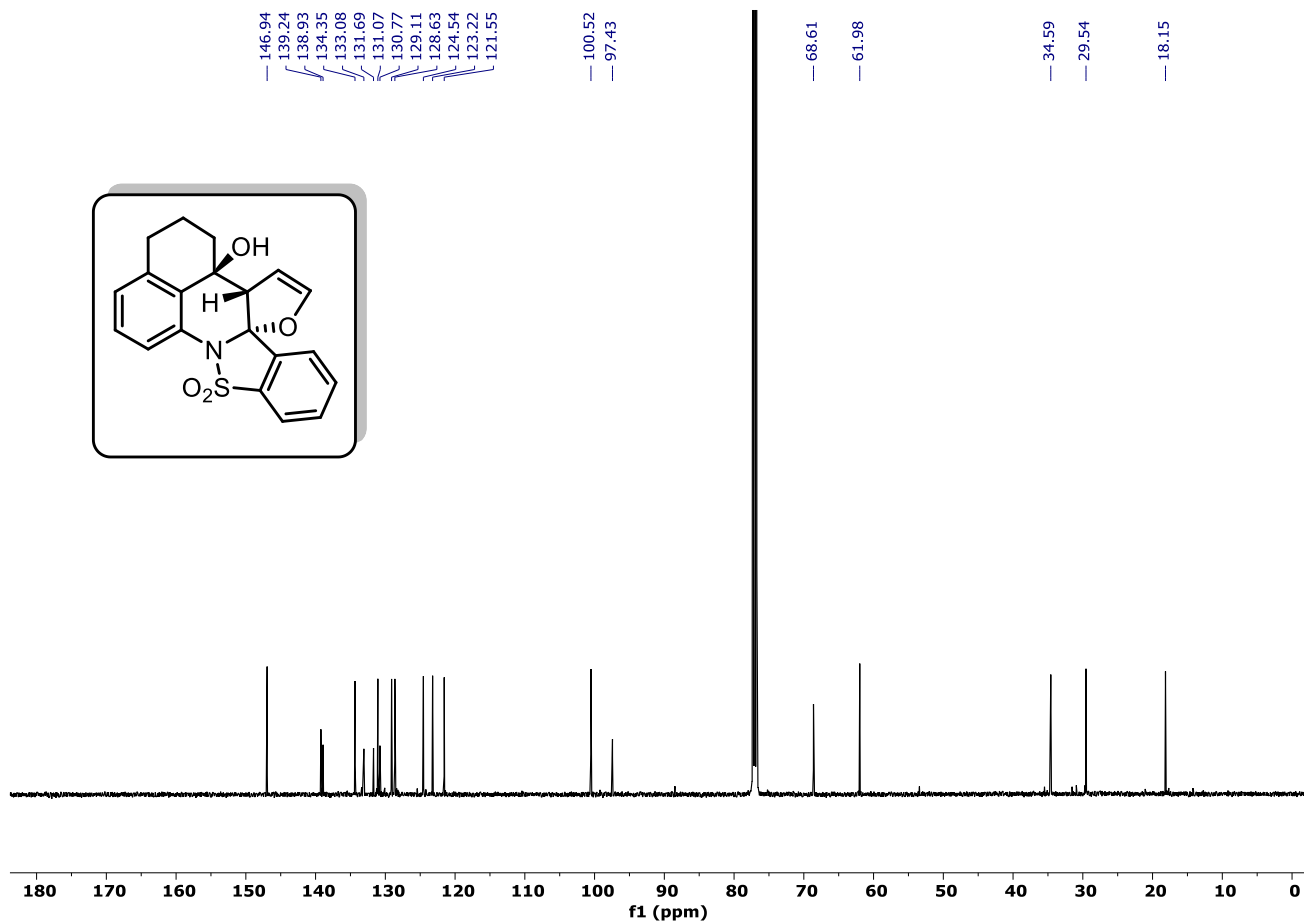

HSQC spectrum of **11g** (CDCl<sub>3</sub>)

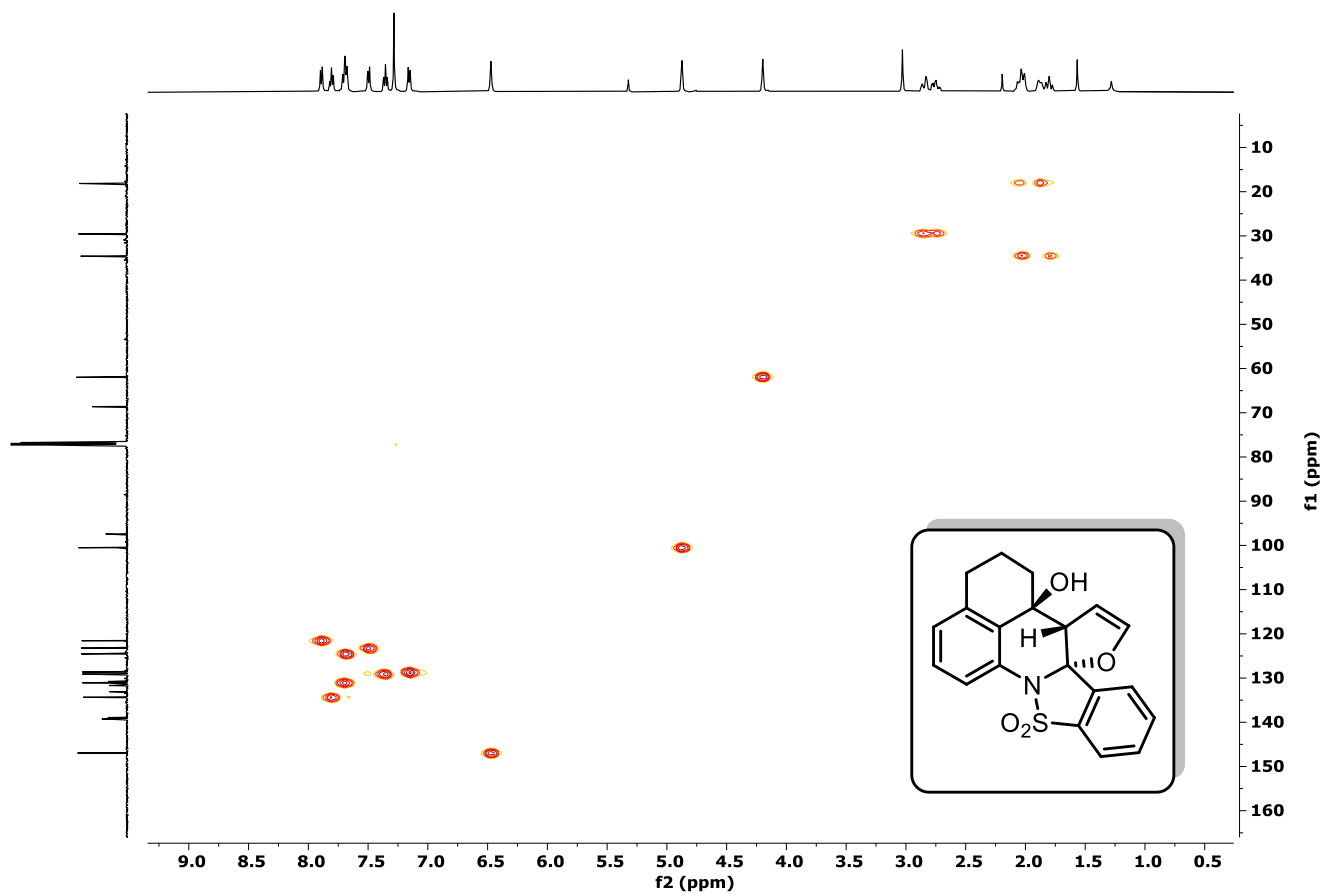

$^1\text{H}$  NMR spectrum of **12** (500 MHz,  $\text{CDCl}_3$ )

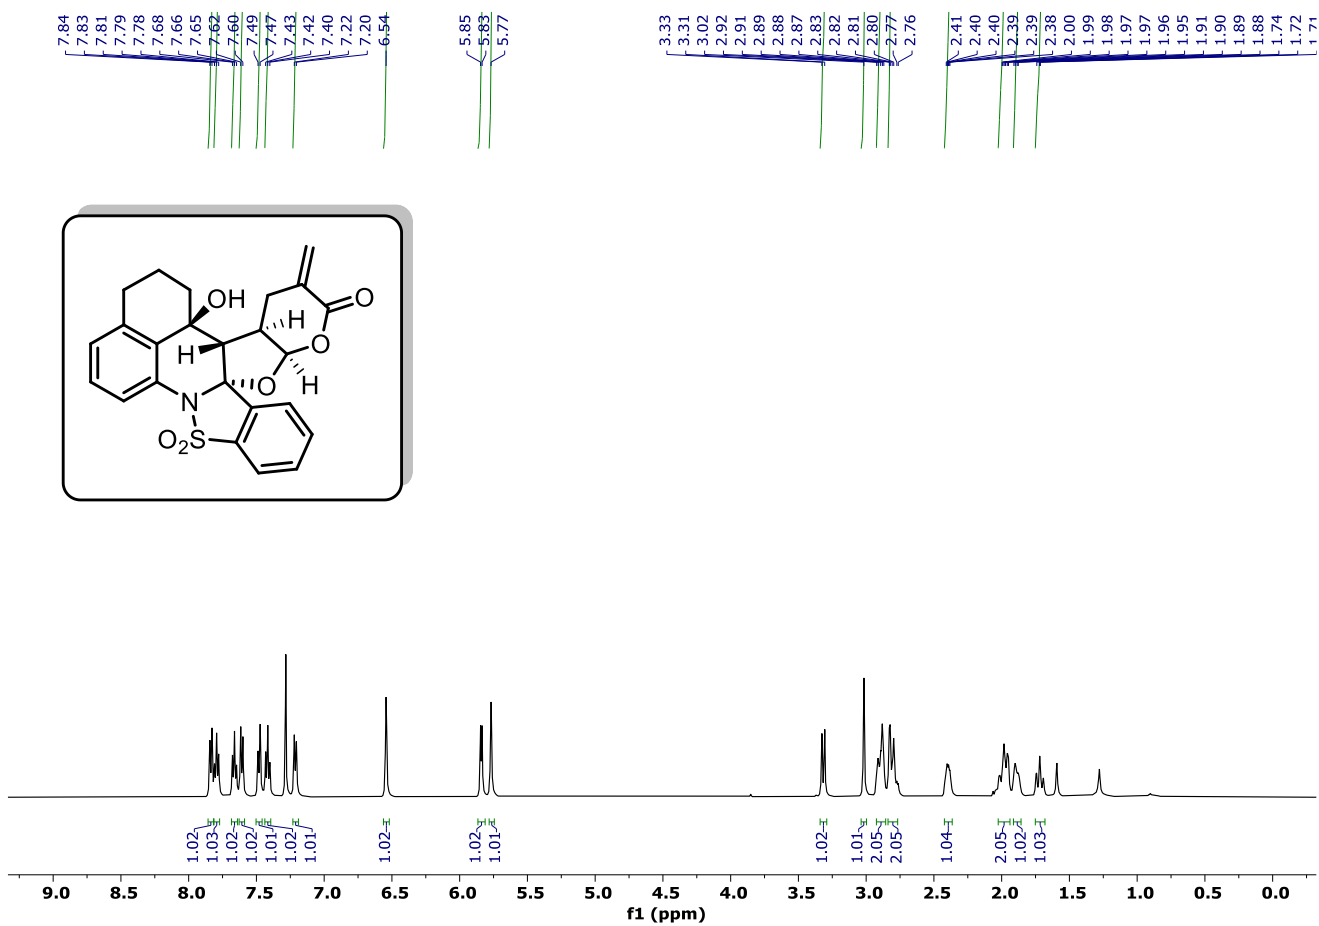

$^{13}\text{C}$  NMR spectrum of **12** (126 MHz,  $\text{CDCl}_3$ )

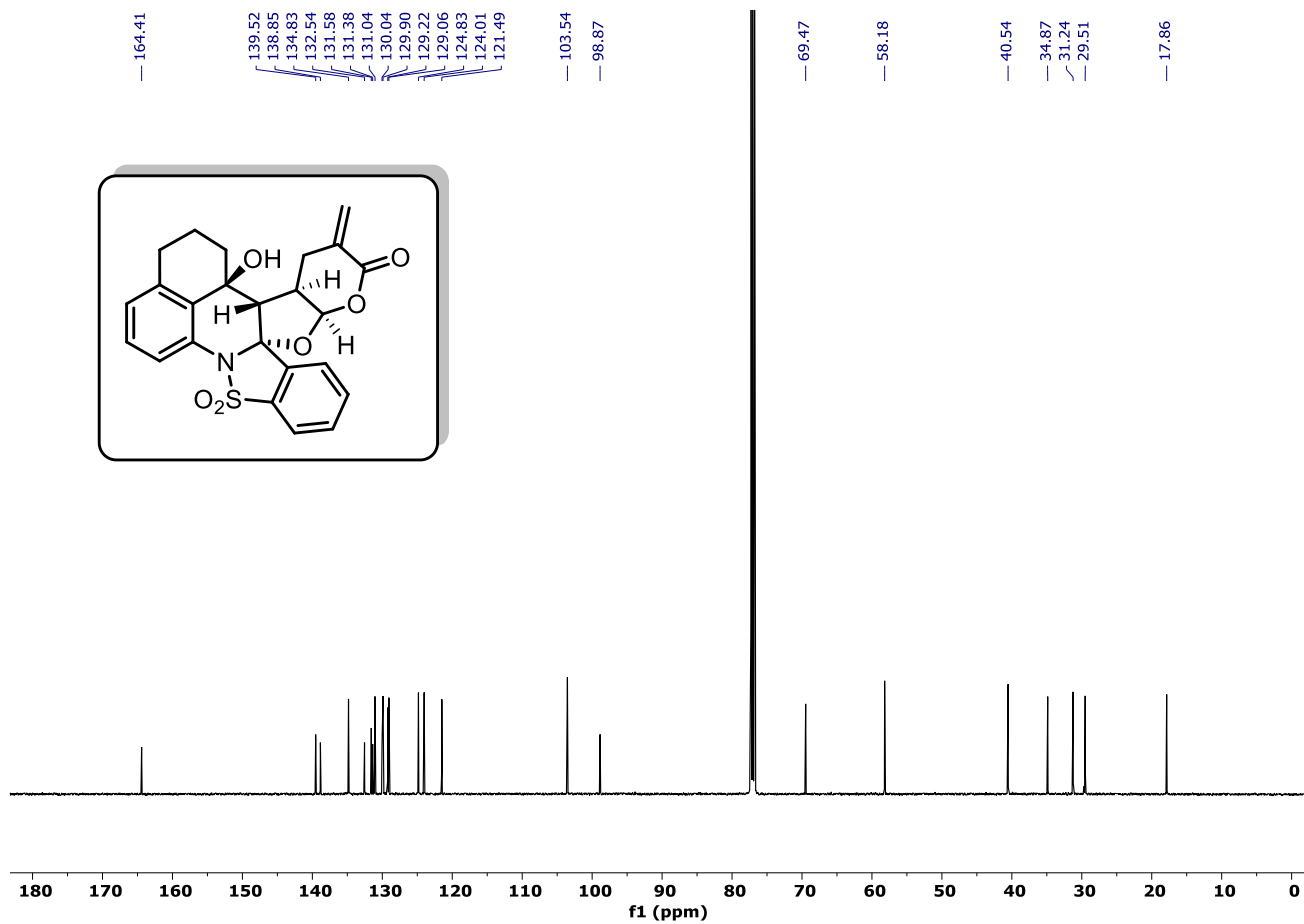

HSQC spectrum of **12** (CDCl<sub>3</sub>)

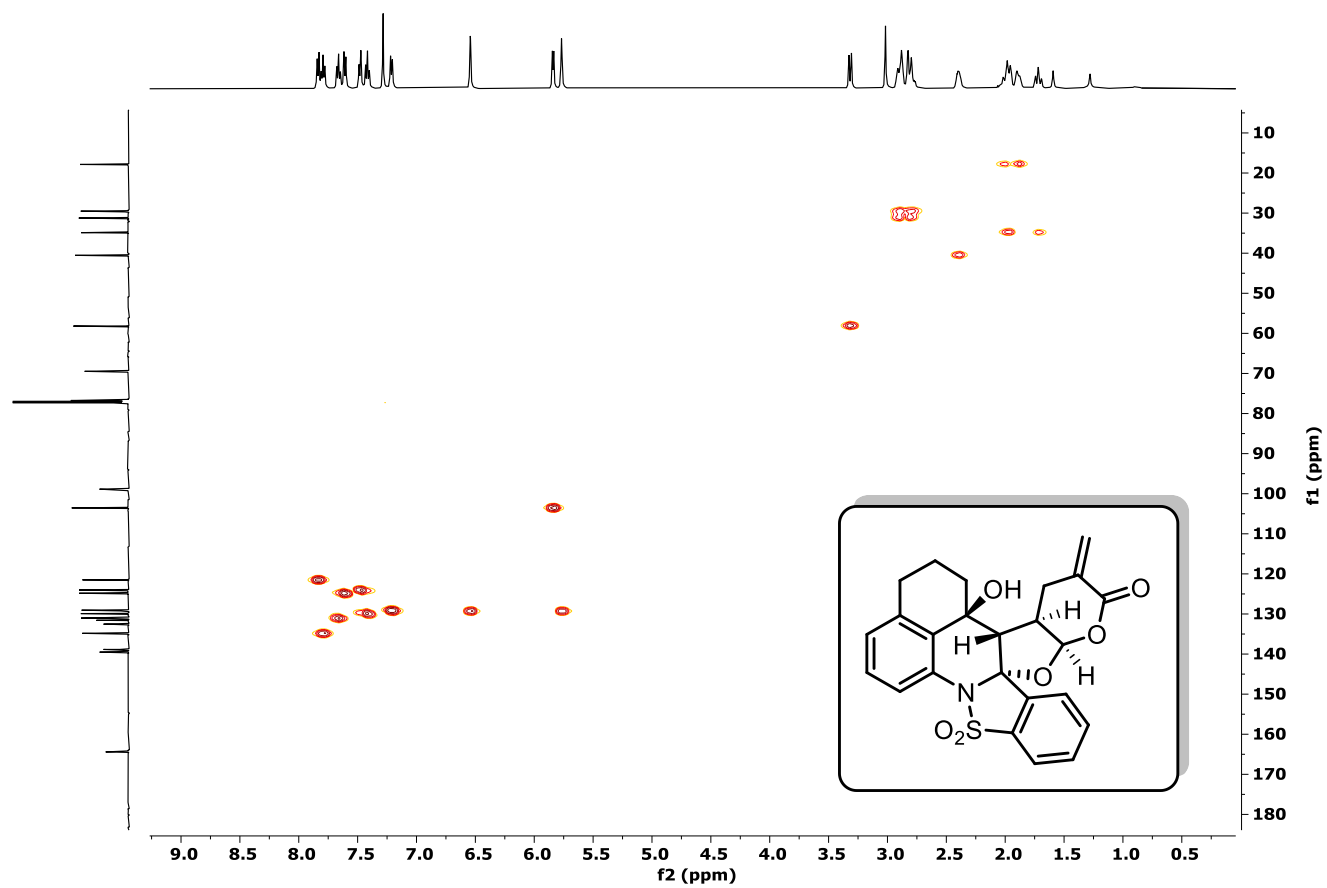

$^1\text{H}$  NMR spectrum of **13** (500 MHz,  $\text{CDCl}_3$ )

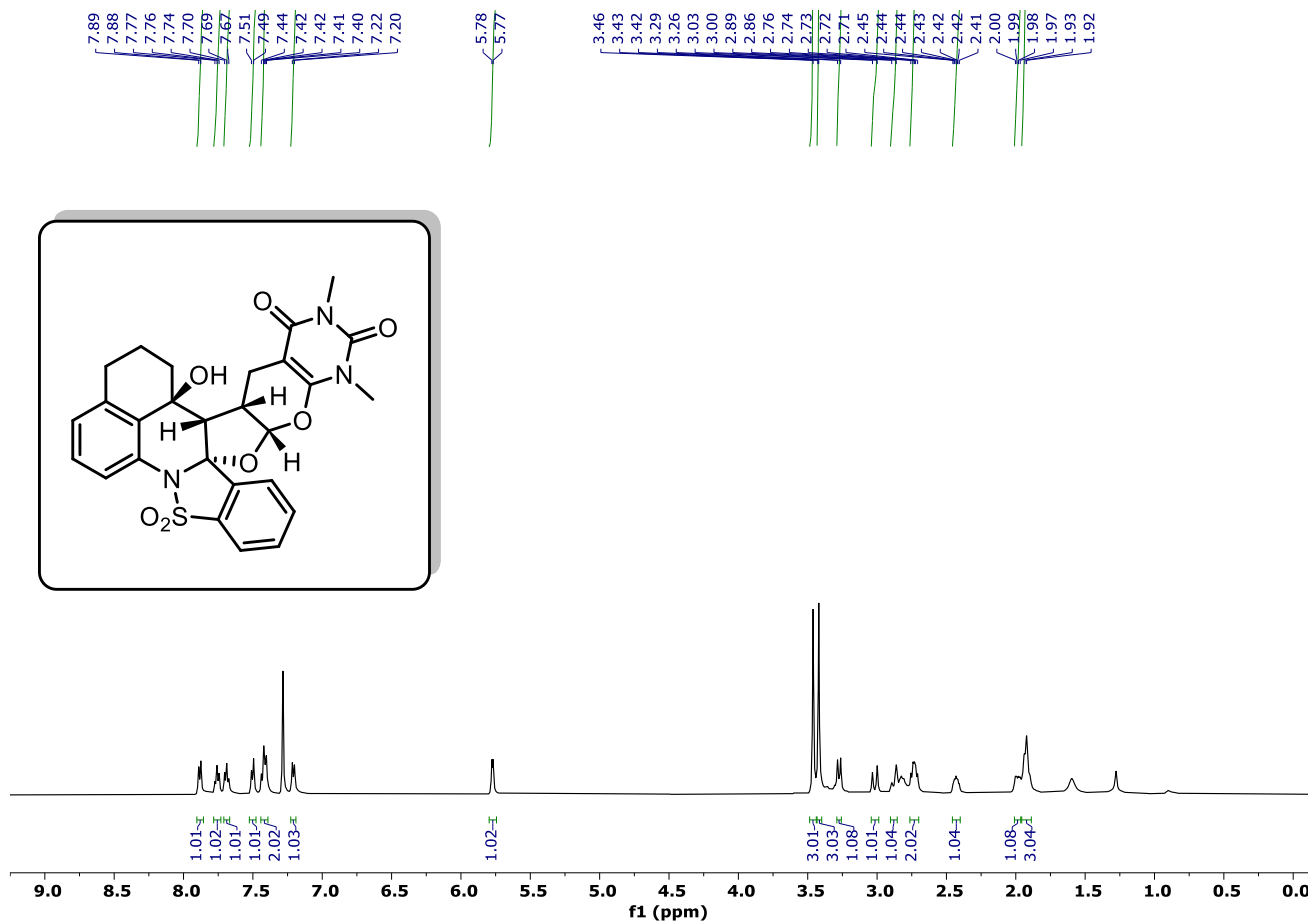

$^{13}\text{C}$  NMR spectrum of **13** (126 MHz,  $\text{CDCl}_3$ )

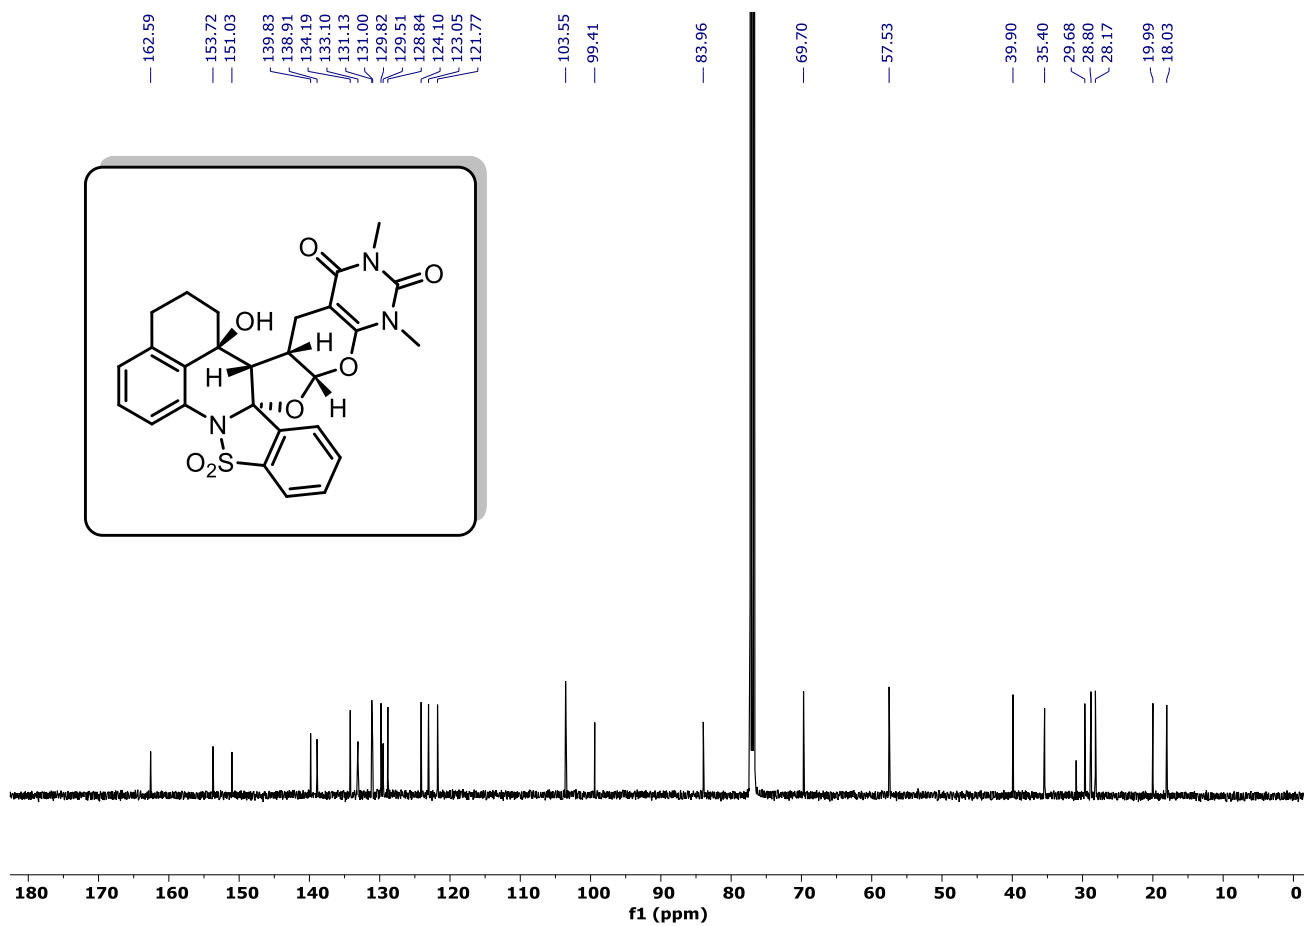

HSQC spectrum of **13** (CDCl<sub>3</sub>)

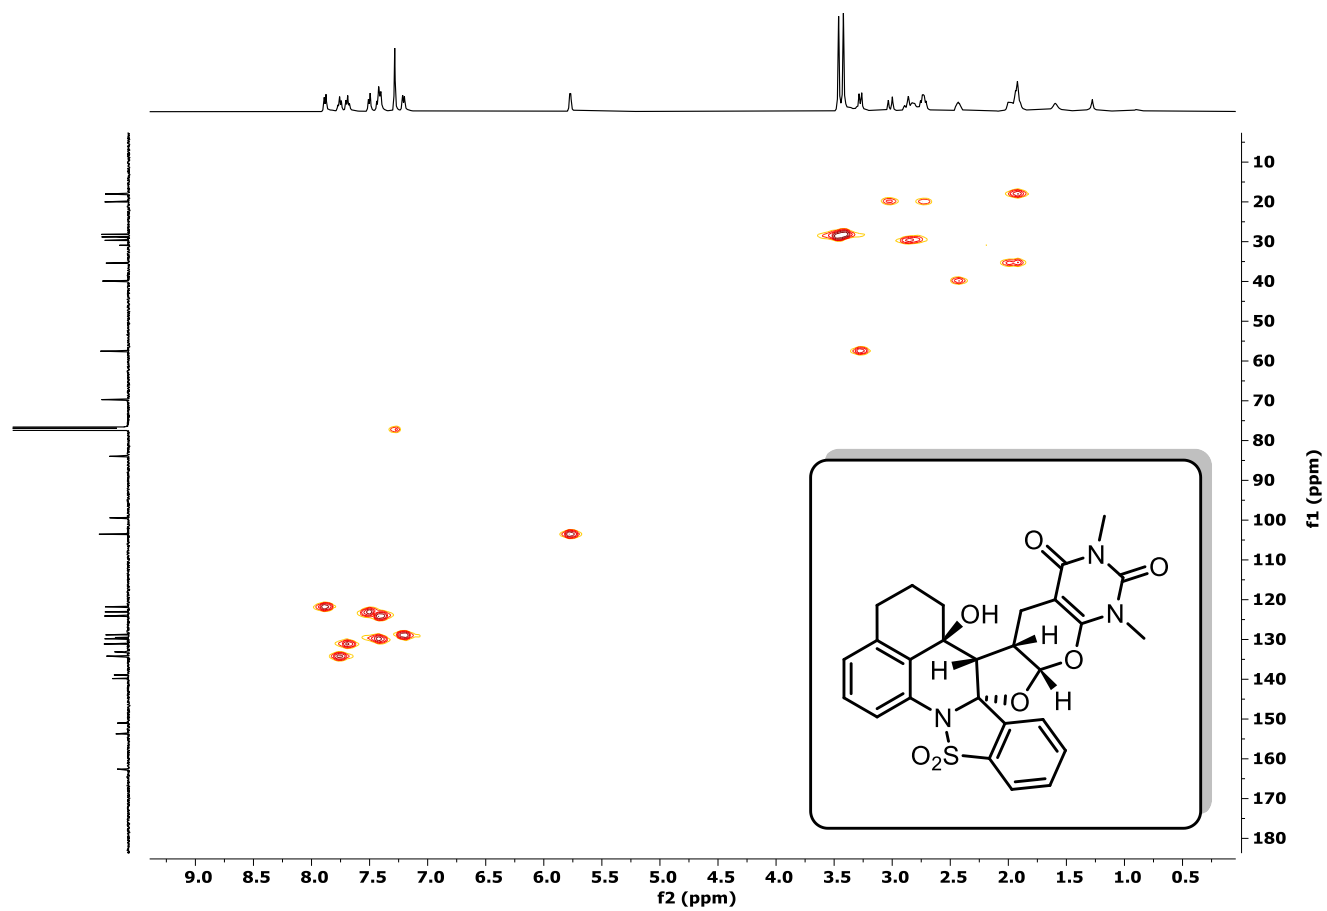

NOESY spectrum of **13** (CDCl<sub>3</sub>)

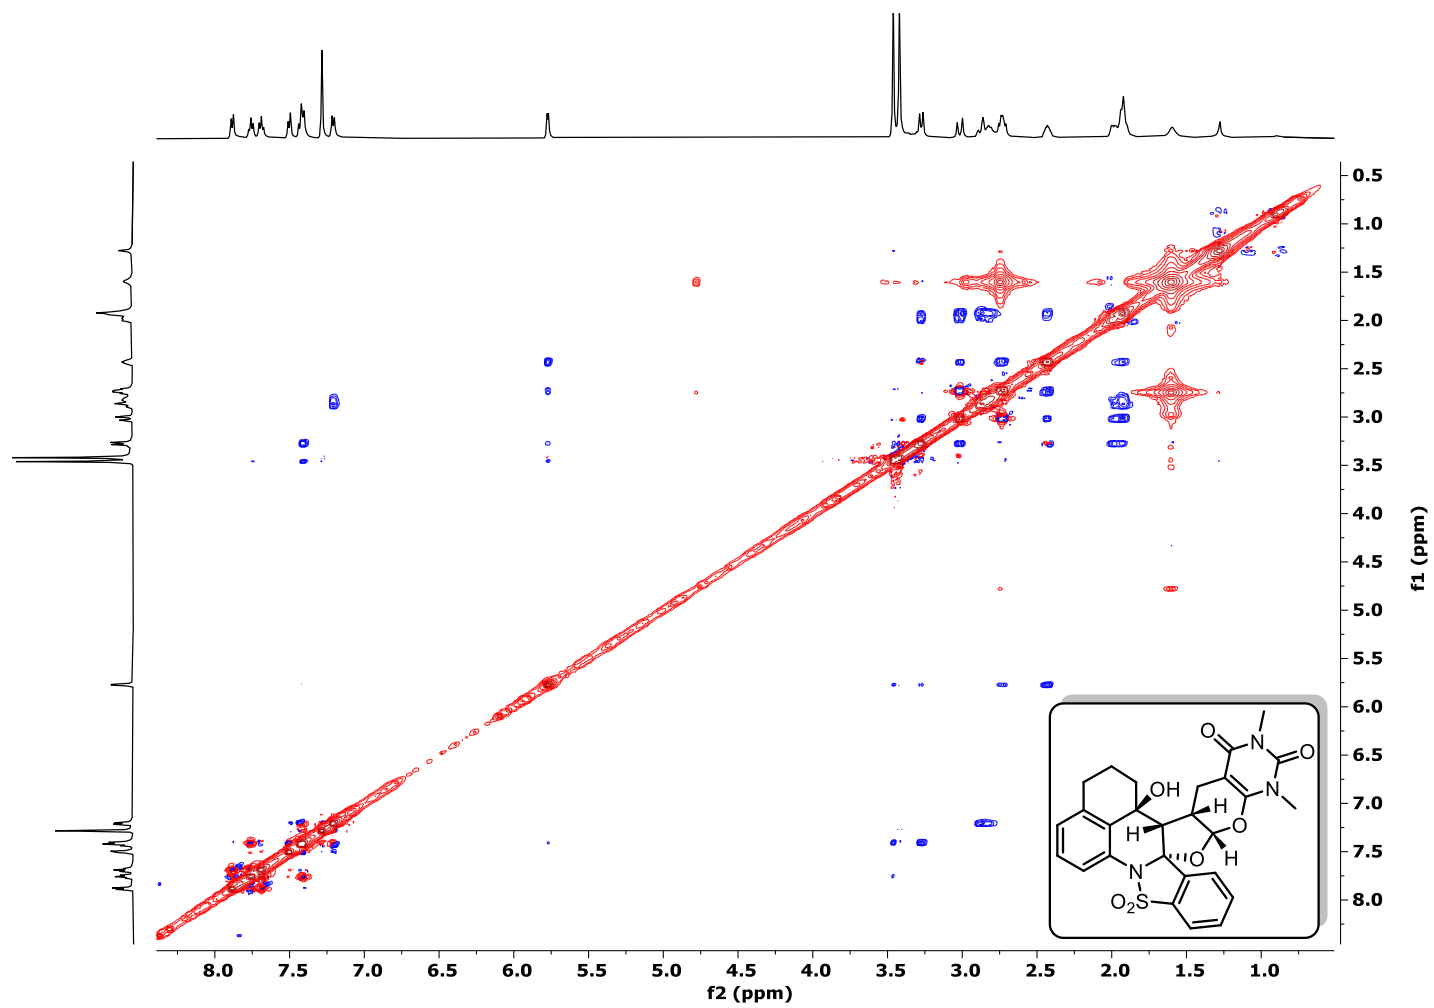

## UV Spectra of photoprecursors

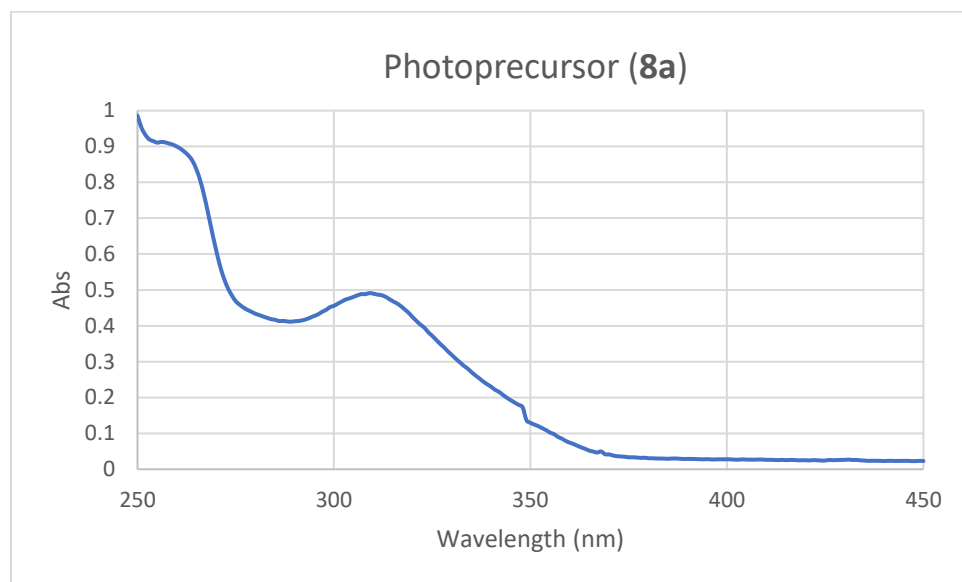

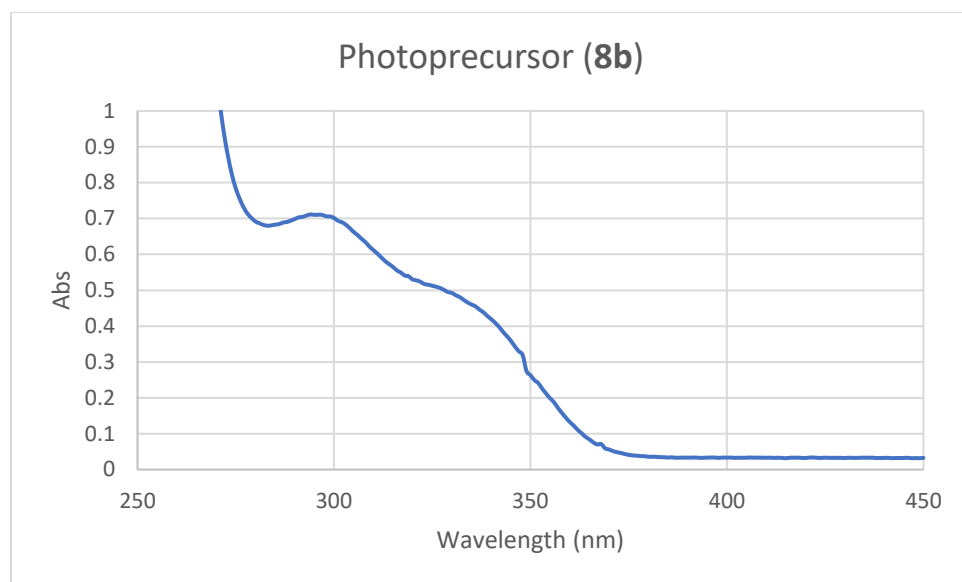

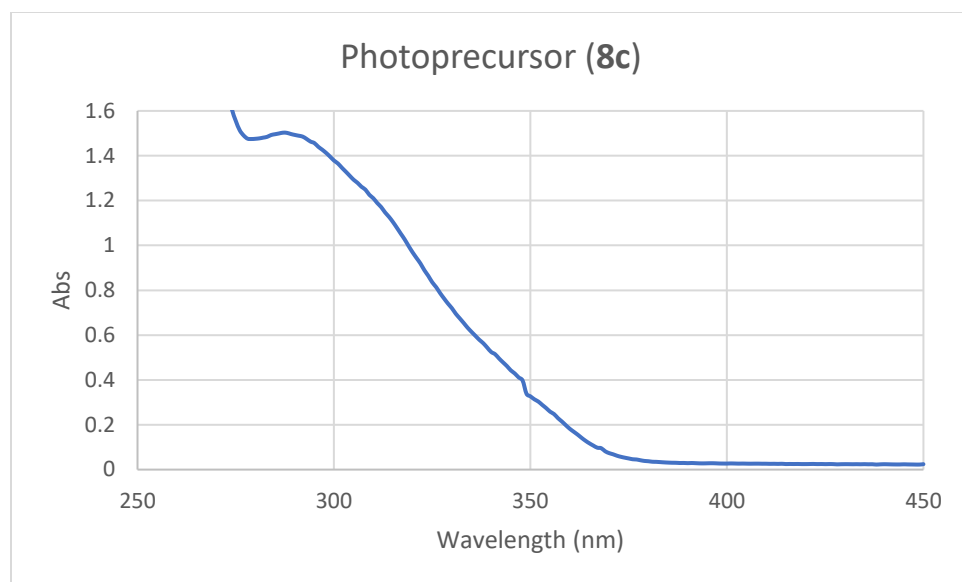

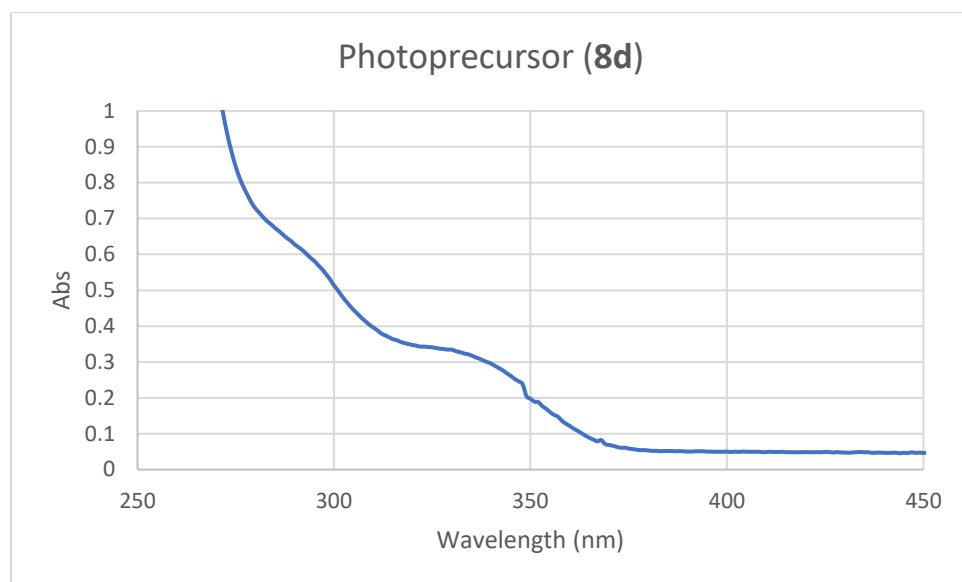

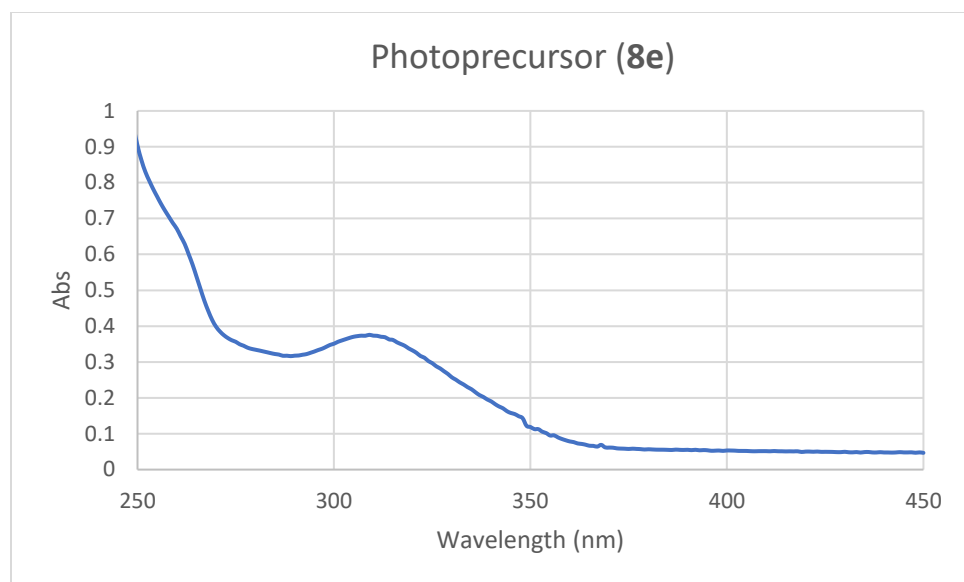

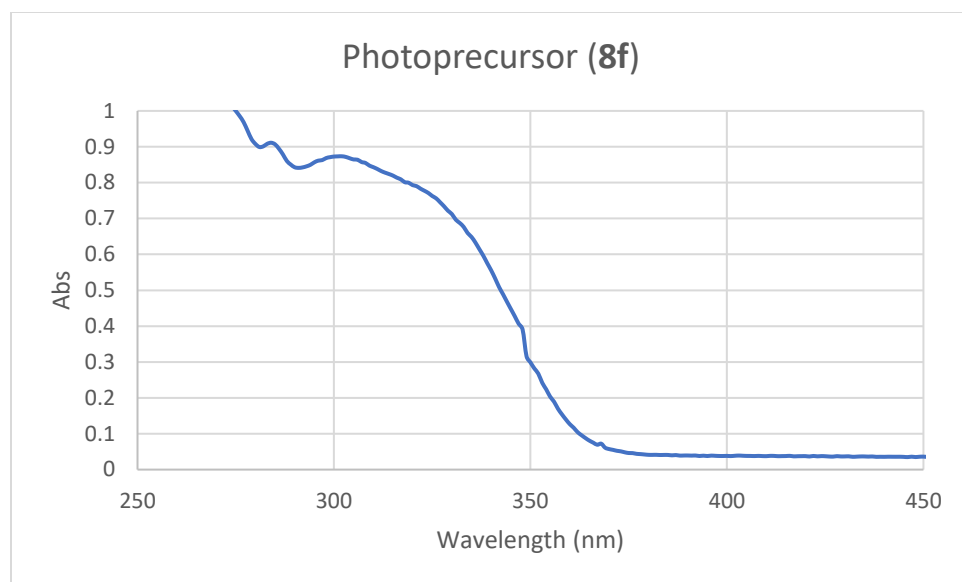

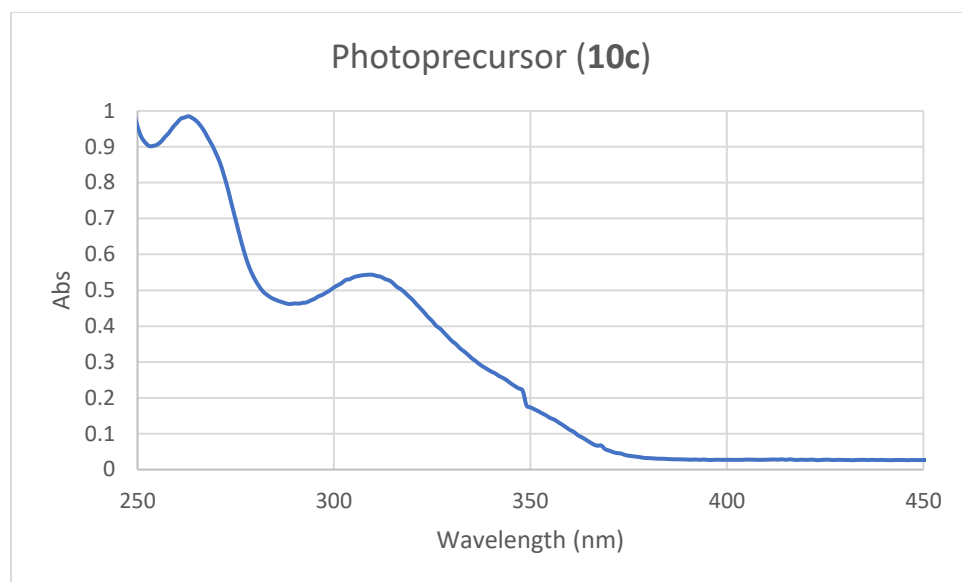

Supplement: s1 [file s1]
